# Supplementary material for: Multiple Transmitter Receptors in Regions and Layers of the Human Cerebral Cortex
Source: PubMed Central journal article supplement (PMC5609104; doi:10.3389/fnana.2017.00078), 2017-09-20
Supplement: Image_1.pdf [file Image_1.pdf]

**Supplementary Figure 1:** Absolute multi-receptor fingerprints of 15 different receptor types in each cortical area. The fingerprints are from additional cortical areas not shown in Figure 4. Scaling of the absolute fingerprints in fmol/mg protein is the same in all areas. For further information, see Figure 6.

**V2d**

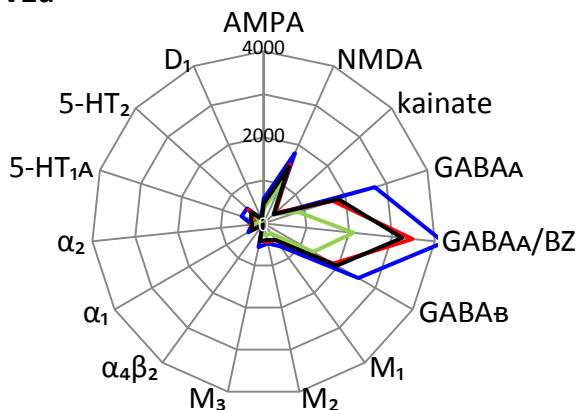

**V3d**

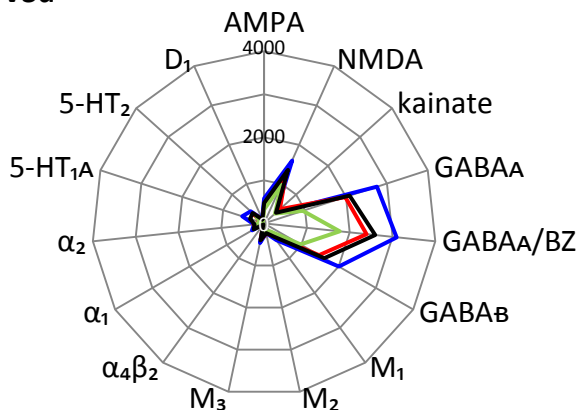

**V3A**

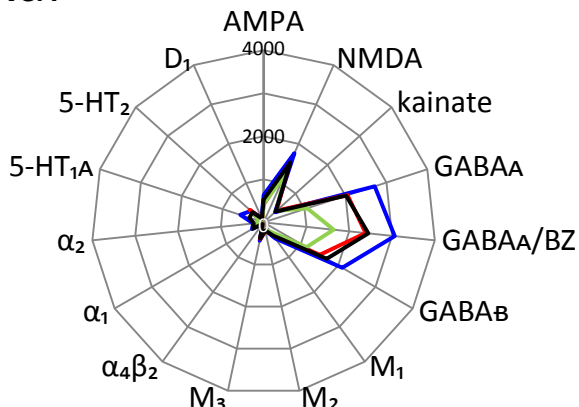

**V4v**

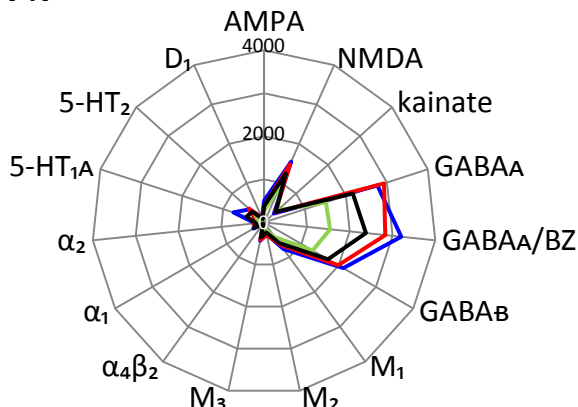

**FG1**

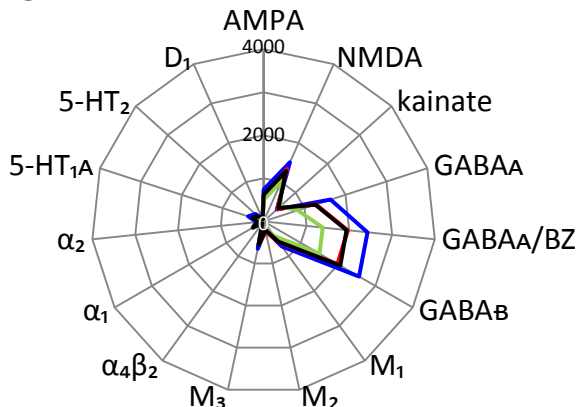

**FG2**

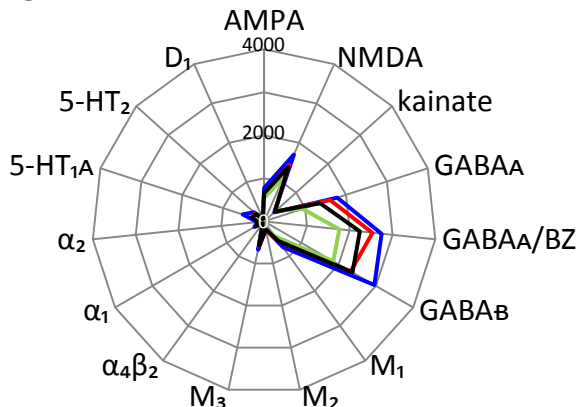

— supragranular

— granular

— infragranular

— all layers

Supplementary Figure 1 (continued - 1)

3a

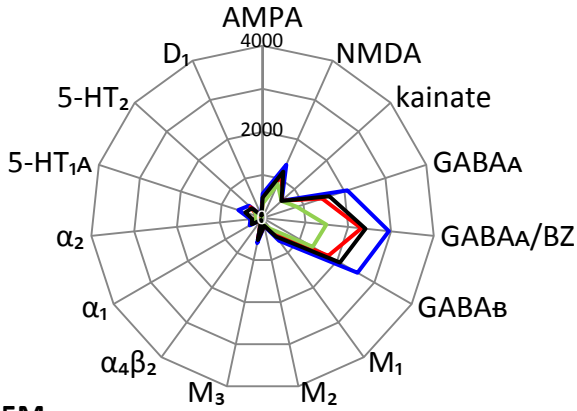

5L

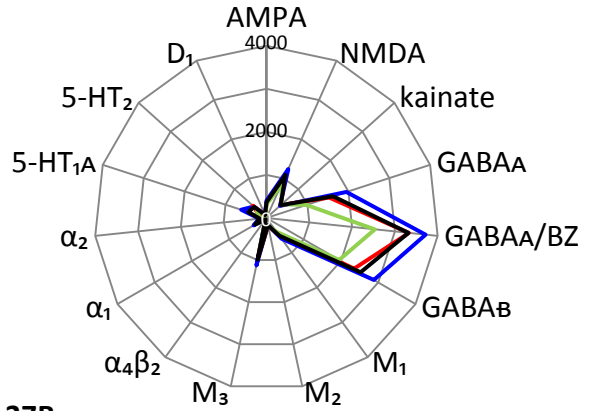

5M

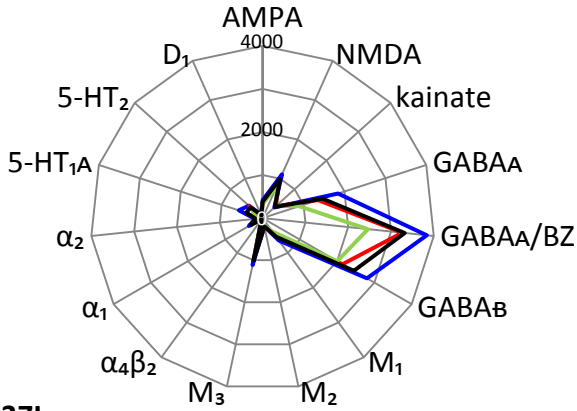

37B

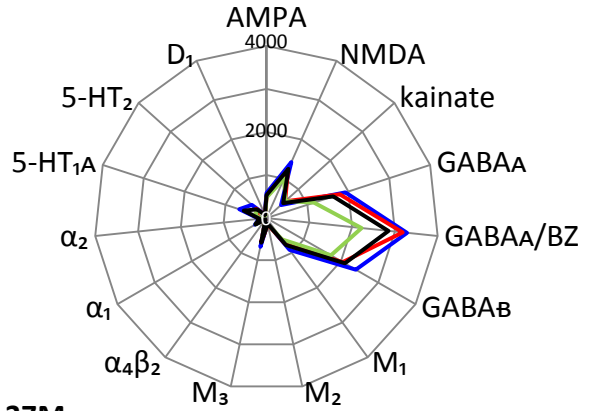

37L

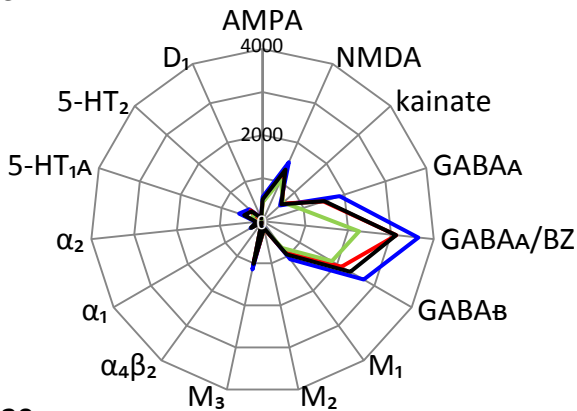

37M

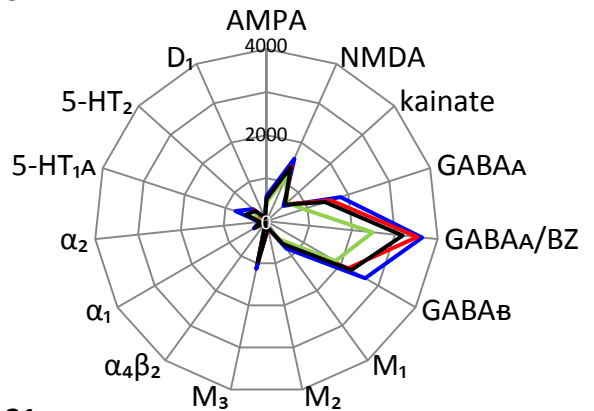

20

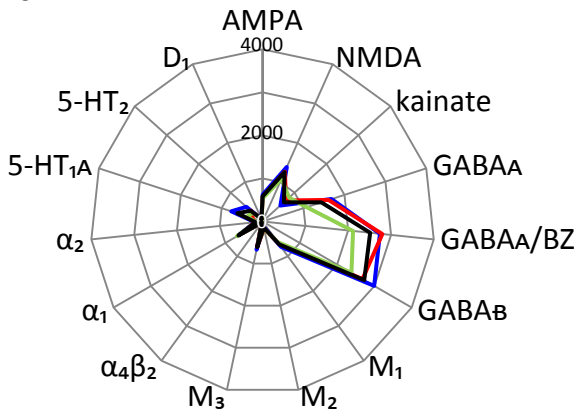

21

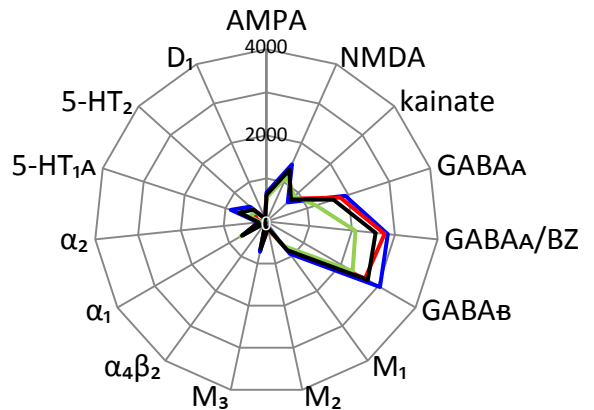

— supragranular — granular — infragranular — all layers

Supplementary Figure 1 (continued - 2)

36

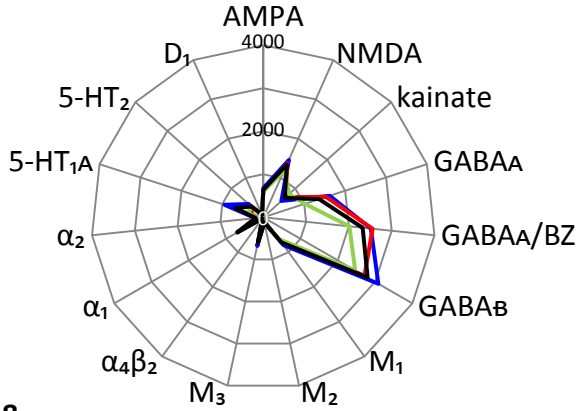

38

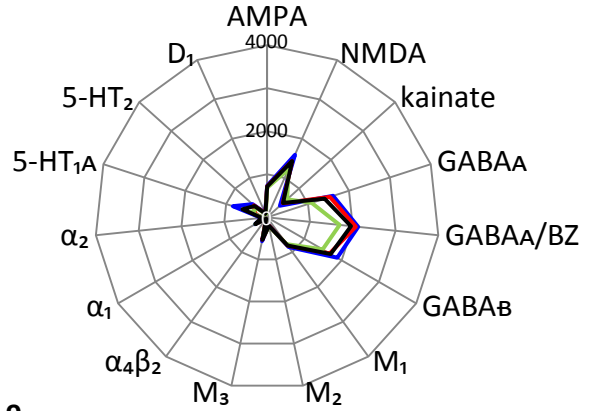

8

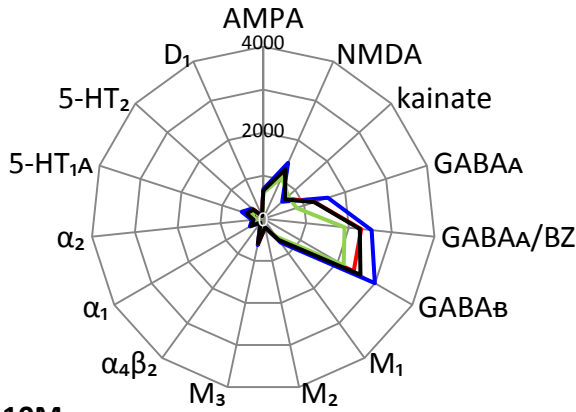

9

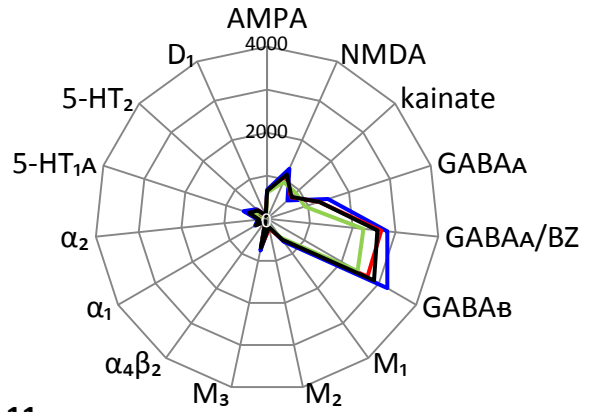

10M

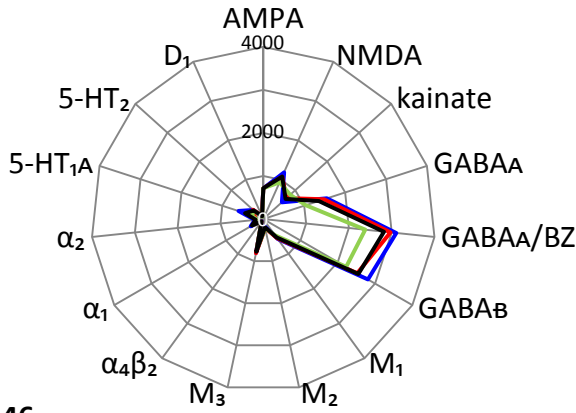

11

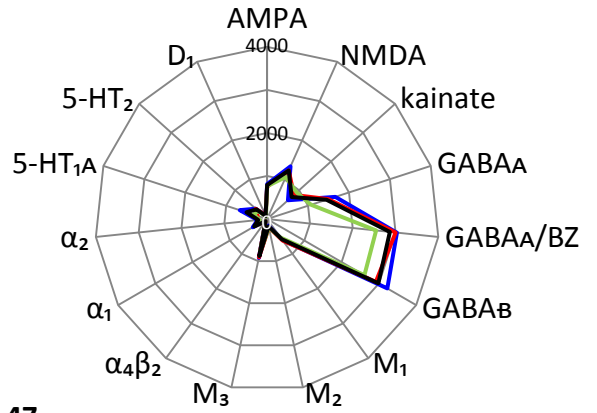

46

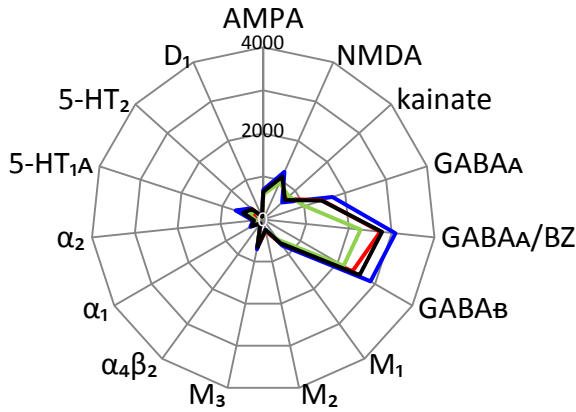

47

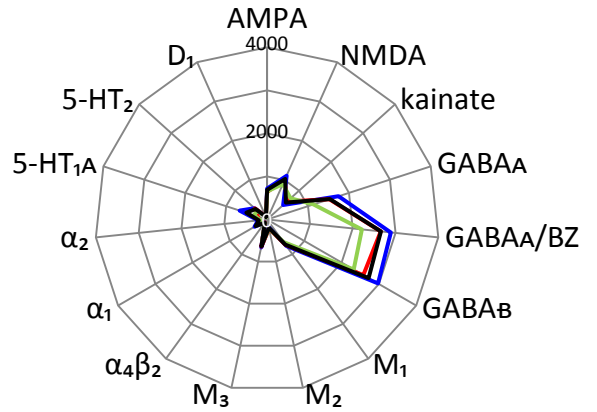

— supragranular — granular — infragranular — all layers

Supplementary Figure 1 (continued - 3)

24

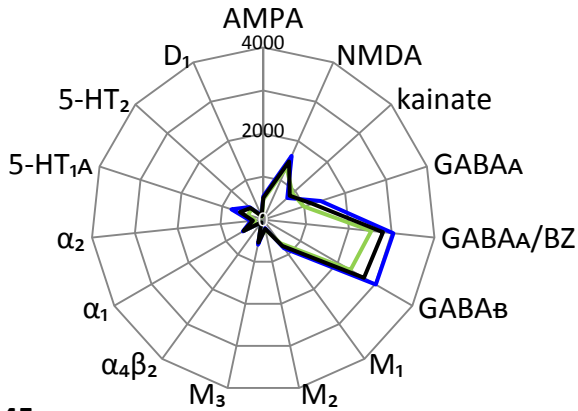

32

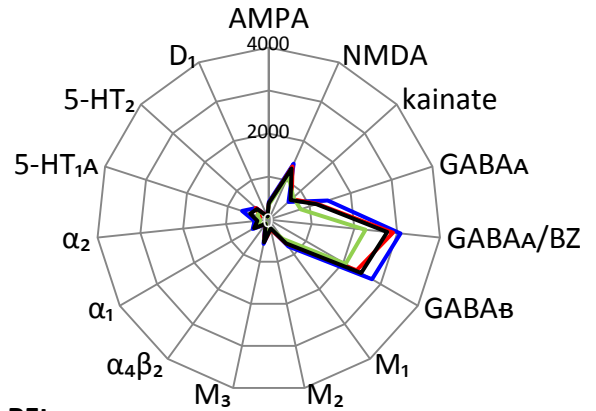

45

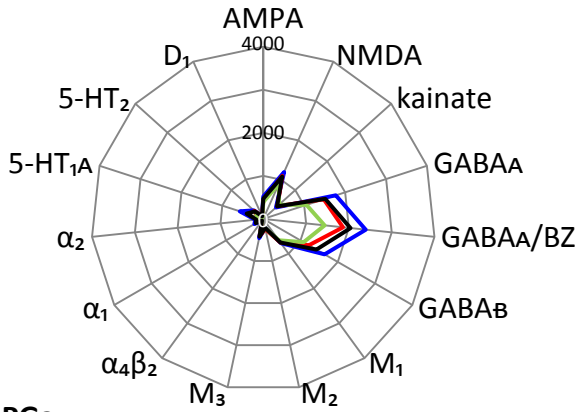

Pft

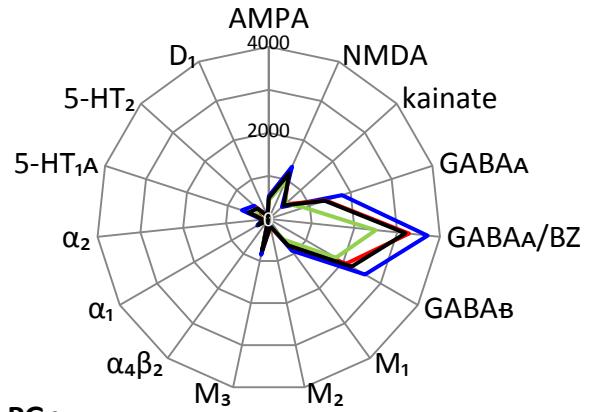

PGa

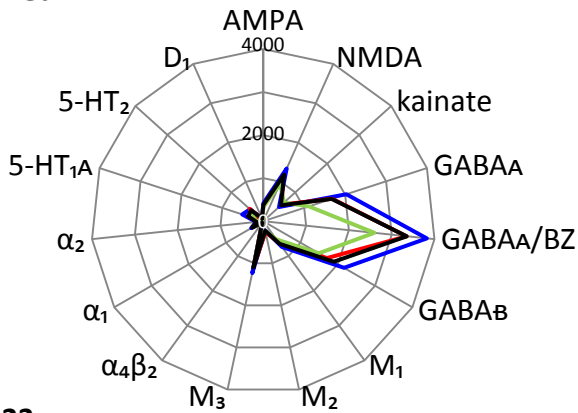

PGp

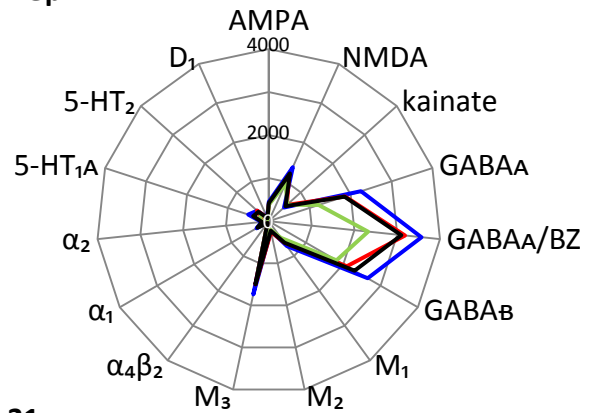

23

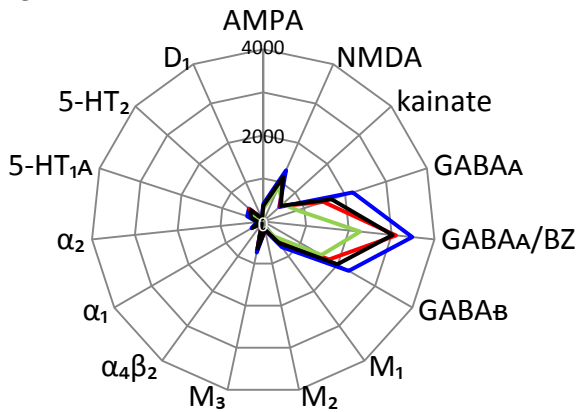

31

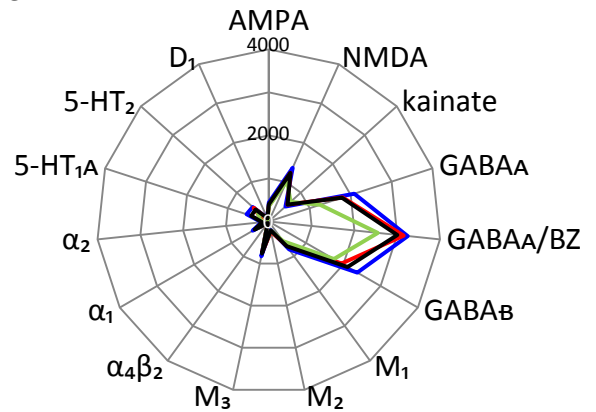

— supragranular — granular — infragranular — all layers
