# Supplementary material for: Multiple Transmitter Receptors in Regions and Layers of the Human Cerebral Cortex
Source: PubMed Central journal article supplement (PMC5609104; doi:10.3389/fnana.2017.00078), 2017-09-20
Supplement: Image_2.pdf [file Image_2.pdf]

**Supplementary Figure 2:** Normalized multi-receptor fingerprints of 15 different receptor types in each cortical area. The fingerprints are from additional cortical areas not shown in Figure 5. The fingerprints are normalized by their z-scores, and the dotted line indicates the average z-score over all areas. For further information, see Figure 7.

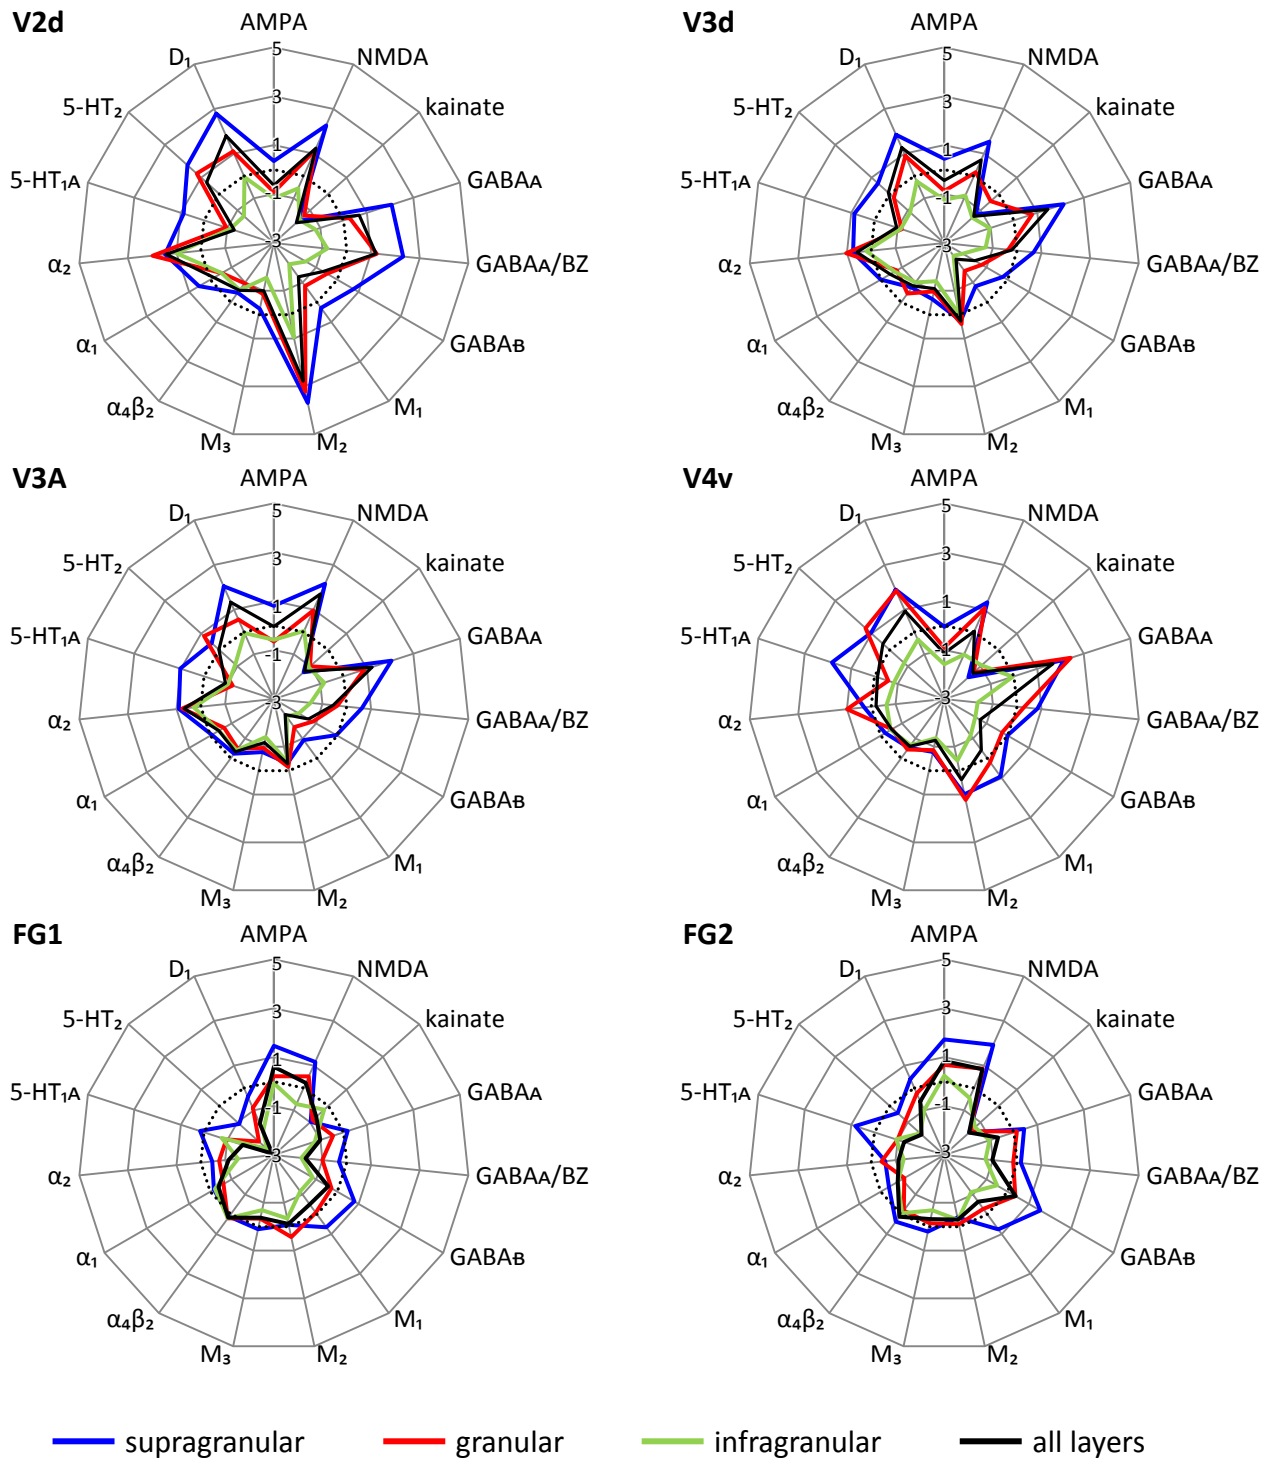

### Supplementary Figure 2 (continued - 1)

**3a**

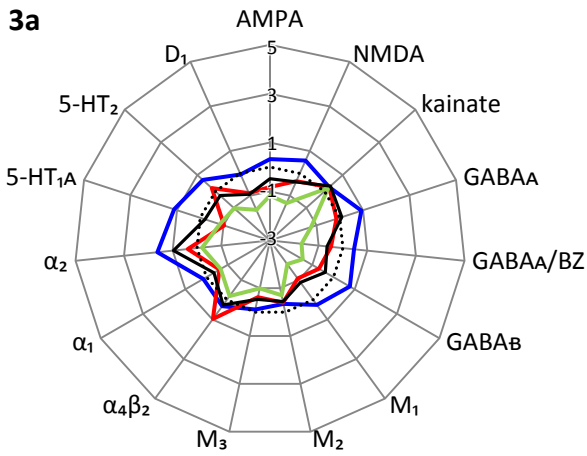

**5L**

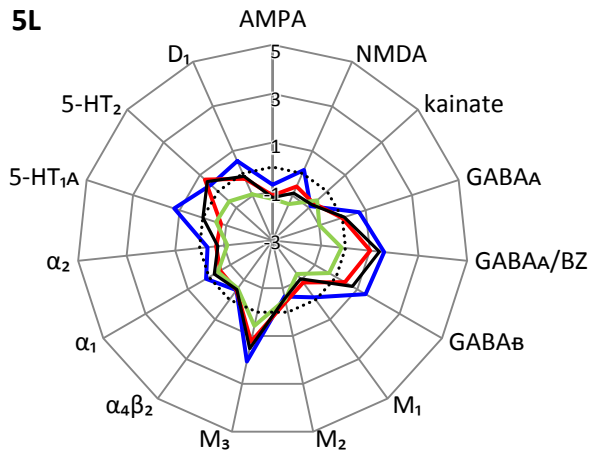

**5M**

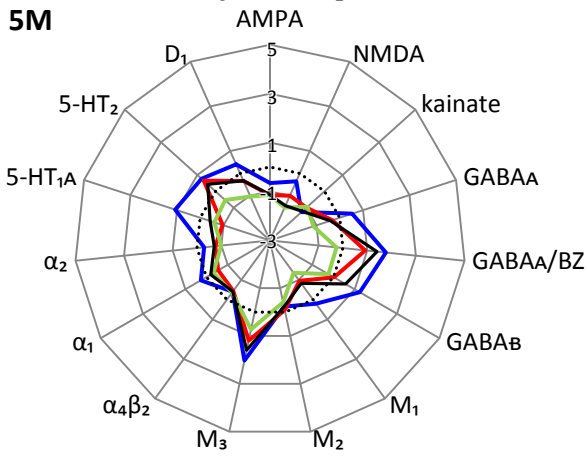

**37B**

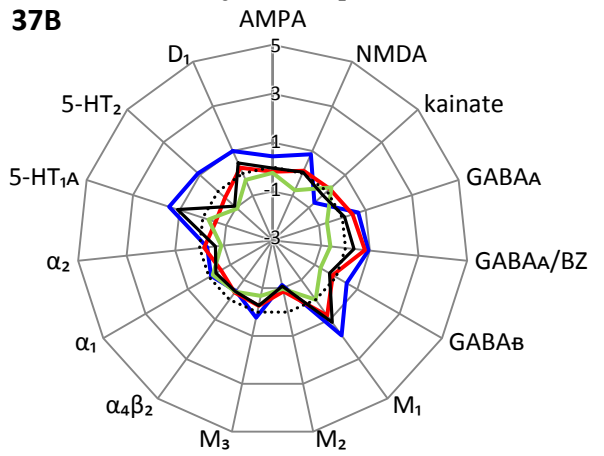

**37L**

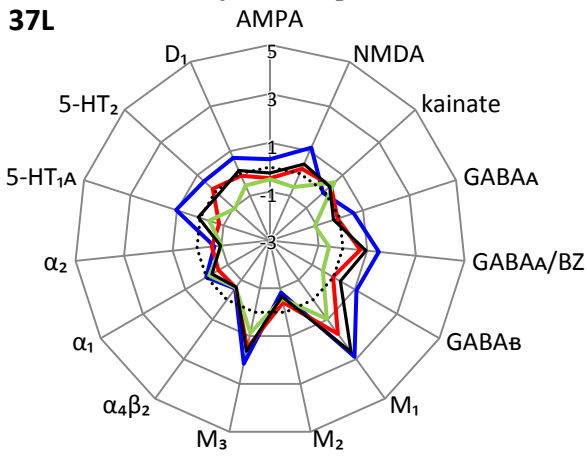

**37M**

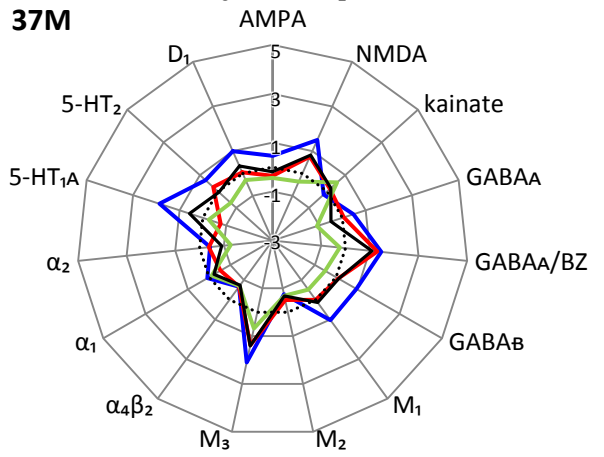

**20**

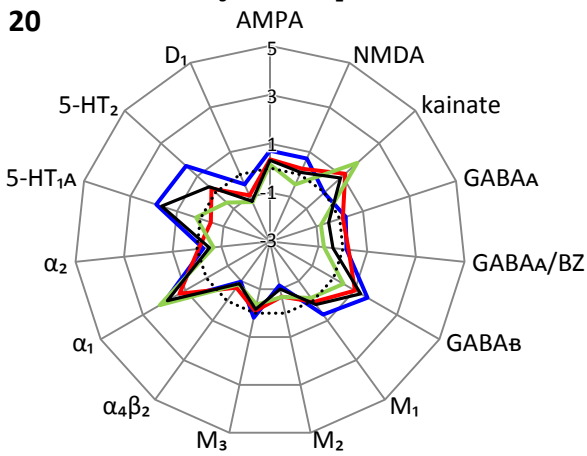

**21**

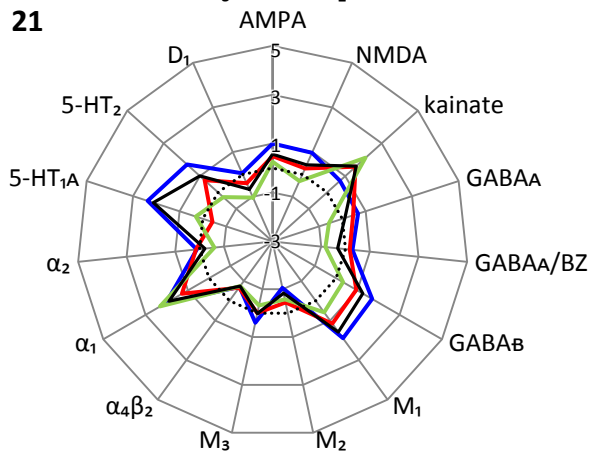

— supragranular

— granular

— infragranular

— all layers

Supplementary Figure 2 (continued - 2)

36

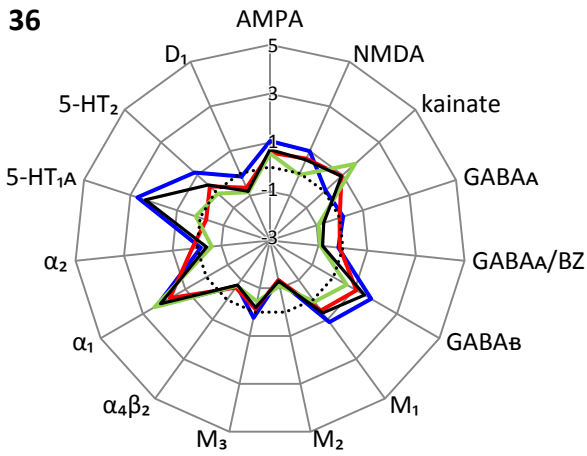

38

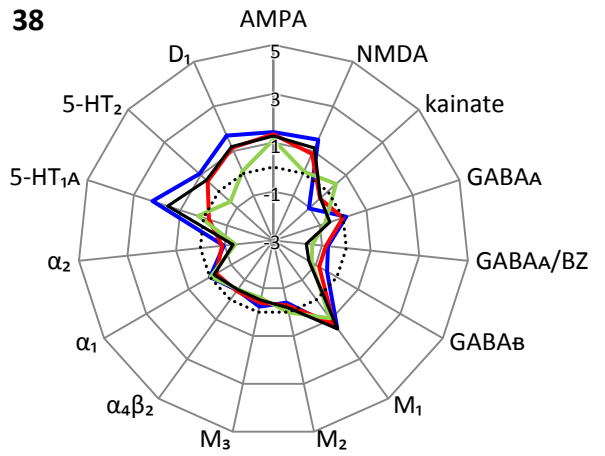

8

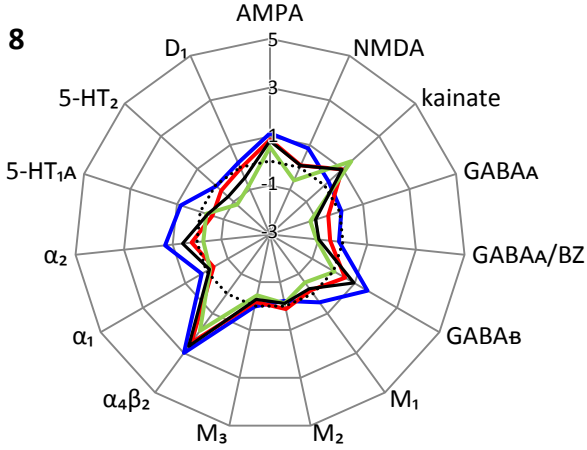

9

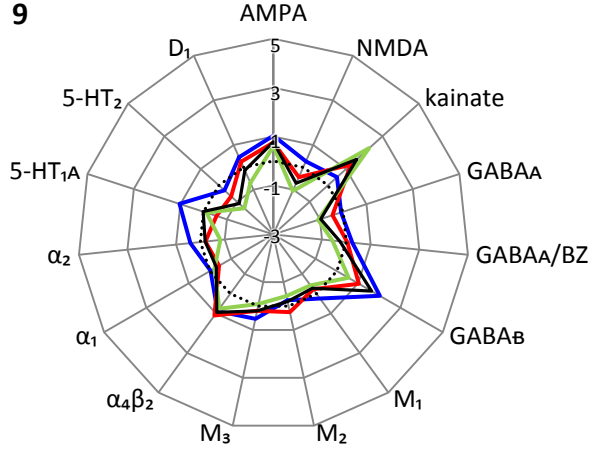

10M

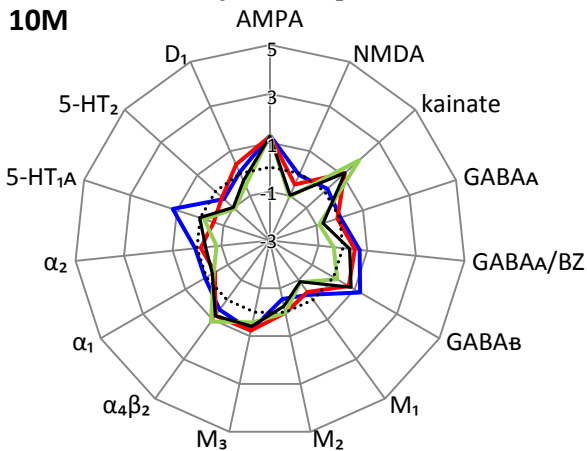

11

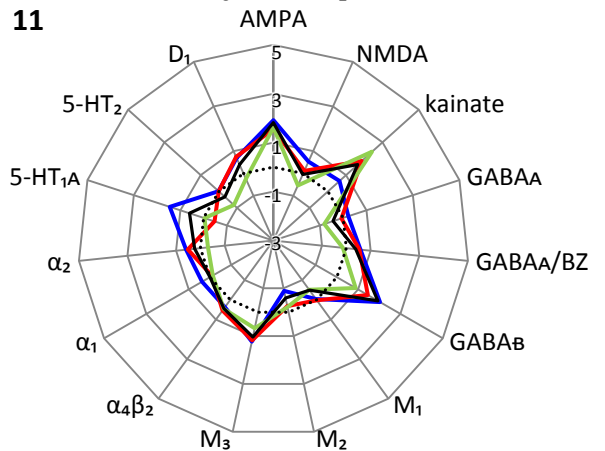

46

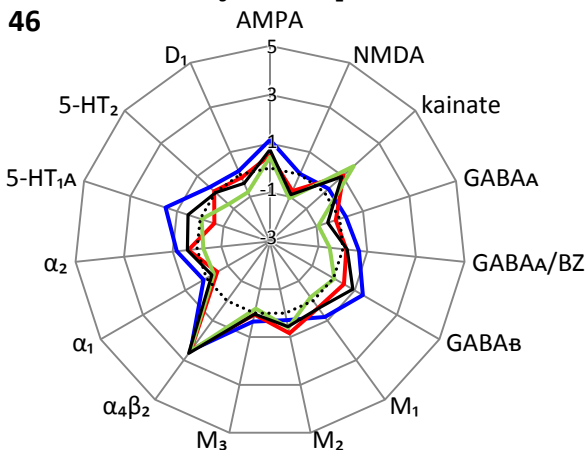

47

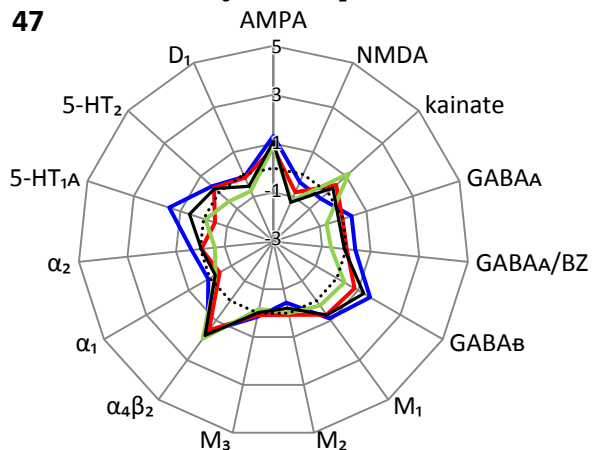

— supragranular

— granular

— infragranular

— all layers

Supplementary Figure 2 (continued - 3)

24

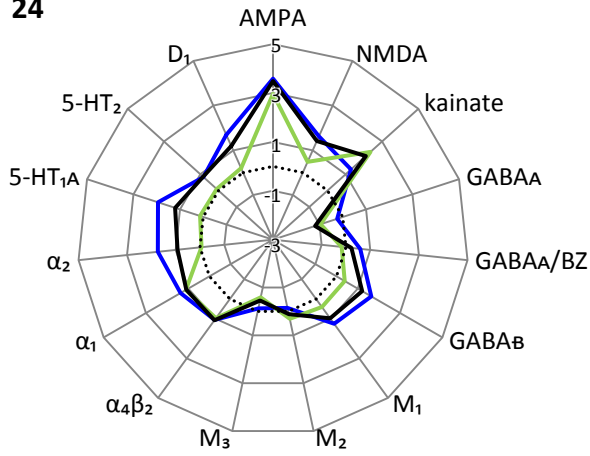

32

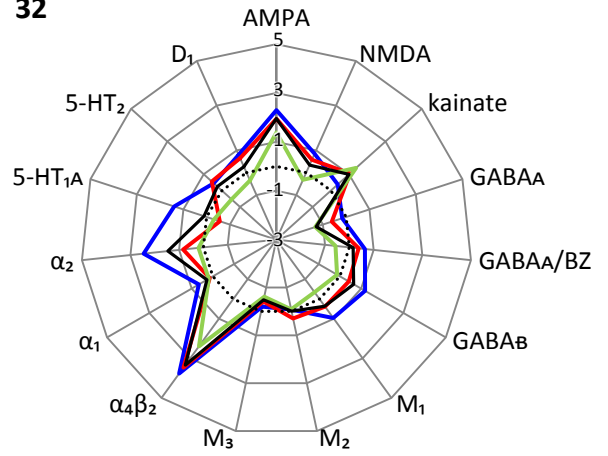

45

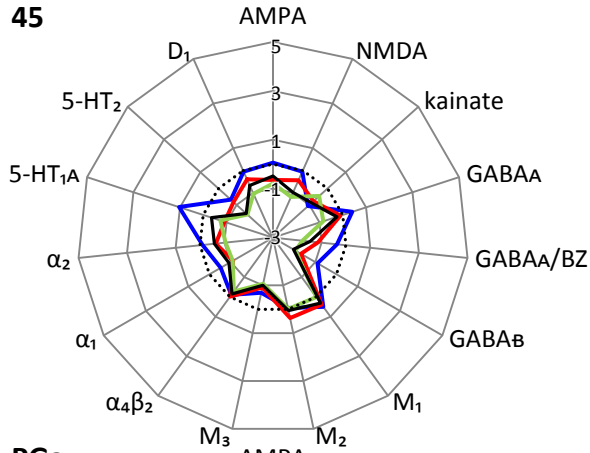

Pft

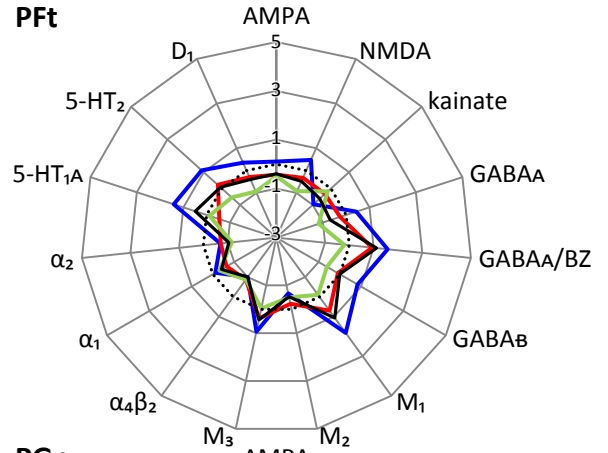

PGa

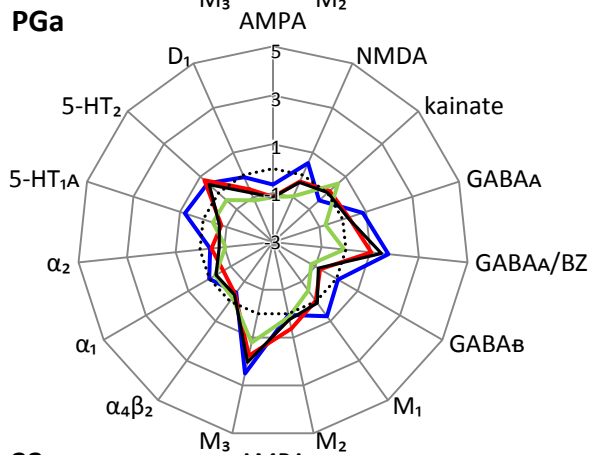

PGp

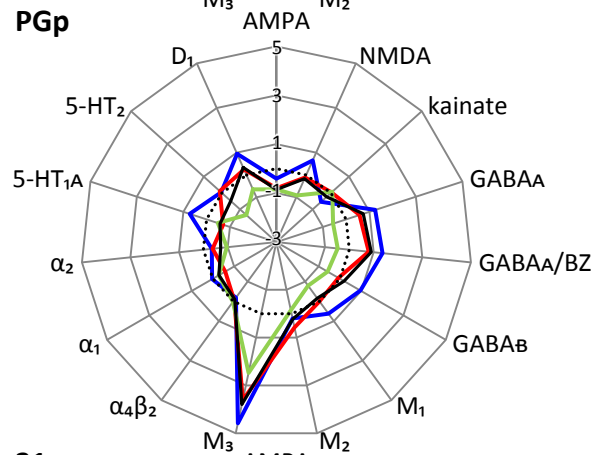

23

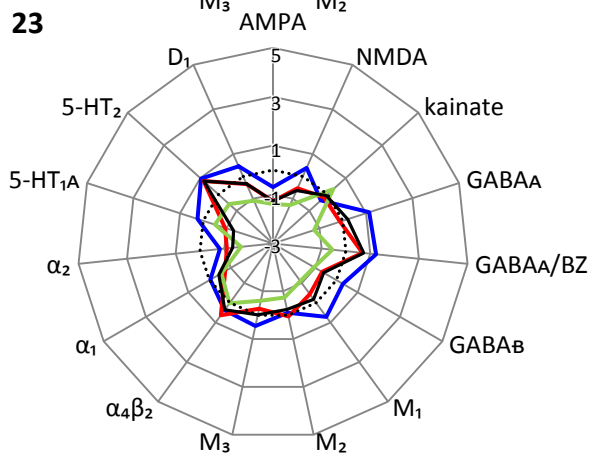

31

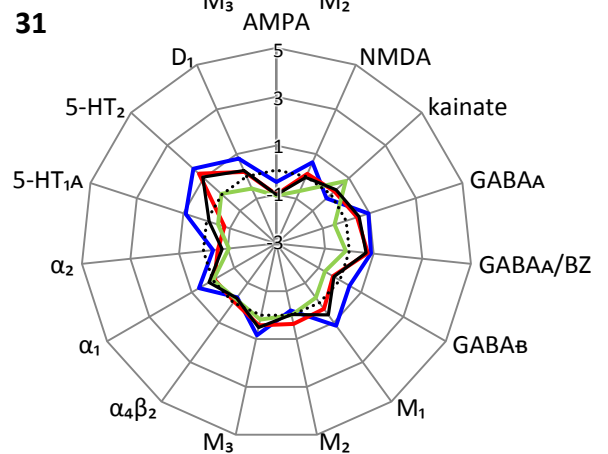

— supragranular — granular

— infragranular — all layers
