# Supplementary material for: Multiple Transmitter Receptors in Regions and Layers of the Human Cerebral Cortex
Source: Front Neuroanat. 2017 Sep 20;11:78. doi: 10.3389/fnana.2017.00078 (PMC5609104; doi:10.3389/fnana.2017.00078)
Supplement: Supplementary file 5 [file Table_5.pdf]

P values resulting from the discriminant analyses of fingerprints obtained from the granular stratum of each area. Red codes  $p \leq 0.01$ , orange codes  $p \leq 0.05$ .

|     | 1 | 2    | 3a   | 3b   | V1   | V2d  | V2v  | V3A  | V3d  | V3v  | V4v  | FG1  | FG2  | 37B  | 37L  | 37M  | 41   | 42   | 20   | 21   | 22   | 36   | 38   | 5L   | 5M   | PGa  | PGp  | Pft  | PFm  | 32   | 23   | 31   | 4    | 6    | 8    | 9    | 10L  | 10M  | 11   | 44   | 45   | 46   | 47   |      |    |
|-----|---|------|------|------|------|------|------|------|------|------|------|------|------|------|------|------|------|------|------|------|------|------|------|------|------|------|------|------|------|------|------|------|------|------|------|------|------|------|------|------|------|------|------|------|----|
| 1   | - | 0.31 | 0.79 | 0.96 | 0.72 | 0.66 | 0.22 | 0.57 | 0.66 | 0.29 | 0.22 | 0.12 | 0.09 | 0.30 | 0.43 | 0.39 | 0.28 | 0.57 | 0.51 | 0.41 | 0.21 | 0.14 | 0.26 | 0.55 | 0.81 | 0.93 | 0.11 | 0.45 | 0.10 | 0.23 | 0.45 | 0.68 | 0.11 | 0.92 | 0.41 | 0.16 | 0.38 | 0.35 | 0.25 | 0.32 | 0.84 | 0.09 | 0.17 | 1    |    |
| 2   |   | -    | 0.32 | 0.04 | 0.09 | 0.45 | 0.04 | 0.36 | 0.08 | 0.41 | 0.80 | 0.50 | 0.19 | 0.86 | 0.33 | 0.45 | 0.09 | 0.36 | 0.41 | 0.71 | 0.83 | 0.12 | 0.12 | 0.88 | 0.32 | 0.30 | 0.31 | 0.21 | 0.54 | 0.82 | 0.08 | 0.77 | 0.07 | 0.31 | 0.25 | 0.02 | 0.64 | 0.66 | 0.38 | 0.20 | 0.51 | 0.10 | 0.38 | 2    |    |
| 3a  |   |      | -    | 0.53 | 0.78 | 0.52 | 0.93 | 0.95 | 0.28 | 0.54 | 0.53 | 0.40 | 0.11 | 0.82 | 0.55 | 0.46 | 0.11 | 0.77 | 0.84 | 0.11 | 0.46 | 0.17 | 0.49 | 0.84 | 0.64 | 0.48 | 0.30 | 0.46 | 0.05 | 0.29 | 0.77 | 0.12 | 0.51 | 0.48 | 0.19 | 0.03 | 0.19 | 0.02 | 0.04 | 0.18 | 0.28 | 0.21 | 3a   |      |    |
| 3b  |   |      |      | -    | 0.69 | 0.78 | 0.52 | 0.93 | 0.95 | 0.28 | 0.02 | 0.00 | 0.00 | 0.02 | 0.00 | 0.01 | 0.01 | 0.05 | 0.00 | 0.01 | 0.01 | 0.07 | 0.01 | 0.50 | 0.01 | 0.00 | 0.00 | 0.01 | 0.00 | 0.01 | 0.01 | 0.43 | 0.05 | 0.05 | 0.50 | 0.01 | 0.04 | 0.03 | 0.00 | 0.05 | 0.01 | 0.16 | 0.00 | 3b   |    |
| V1  |   |      |      |      | -    | 0.04 | 0.05 | 0.09 | 0.08 | 0.06 | 0.02 | 0.15 | 0.13 | 0.04 | 0.01 | 0.90 | 0.04 | 0.01 | 0.01 | 0.08 | 0.05 | 0.07 | 0.26 | 0.02 | 0.69 | 0.01 | 0.04 | 0.02 | 0.32 | 0.11 | 0.01 | 0.14 | 0.07 | 0.12 | 0.02 | 0.31 | 0.82 | 0.89 | 0.01 | 0.02 | 0.02 | 0.02 | 0.02 | V1   |    |
| V2d |   |      |      |      |      | -    | 0.68 | 0.59 | 0.61 | 0.81 | 0.94 | 0.46 | 0.34 | 0.16 | 0.73 | 0.69 | 0.88 | 0.99 | 0.67 | 0.75 | 0.12 | 0.75 | 0.07 | 0.81 | 0.91 | 0.54 | 0.42 | 0.67 | 0.40 | 1.00 | 0.42 | 0.35 | 0.19 | 0.57 | 0.98 | 0.77 | 0.96 | 0.98 | 0.73 | 0.06 | 0.18 | 0.76 | 0.85 | V2d  |    |
| V2v |   |      |      |      |      |      | -    | 0.51 | 0.51 | 0.89 | 0.23 | 0.12 | 0.07 | 0.24 | 0.13 | 0.39 | 0.26 | 0.91 | 0.11 | 0.14 | 0.14 | 0.16 | 0.04 | 0.90 | 0.28 | 0.08 | 0.10 | 0.11 | 0.09 | 0.68 | 0.44 | 0.45 | 0.07 | 0.30 | 0.81 | 0.66 | 0.88 | 0.95 | 0.70 | 0.11 | 0.12 | 0.65 | 0.82 | V2v  |    |
| V3A |   |      |      |      |      |      |      | -    | 0.98 | 0.23 | 0.51 | 0.54 | 0.38 | 0.68 | 0.58 | 0.84 | 0.49 | 0.33 | 0.54 | 0.60 | 0.09 | 0.27 | 0.17 | 0.33 | 0.10 | 0.43 | 0.48 | 0.53 | 0.45 | 0.01 | 0.21 | 0.46 | 0.06 | 0.66 | 0.54 | 0.22 | 0.08 | 0.23 | 0.06 | 0.13 | 0.16 | 0.30 | 0.24 | V3A  |    |
| V3d |   |      |      |      |      |      |      |      | -    | 0.18 | 0.50 | 0.54 | 0.41 | 0.57 | 0.75 | 0.76 | 0.35 | 0.49 | 0.70 | 0.77 | 0.05 | 0.22 | 0.17 | 0.18 | 0.23 | 0.58 | 0.49 | 0.70 | 0.47 | 0.07 | 0.14 | 0.56 | 0.09 | 0.19 | 0.67 | 0.35 | 0.21 | 0.38 | 0.20 | 0.14 | 0.12 | 0.41 | 0.37 | V3d  |    |
| V3v |   |      |      |      |      |      |      |      |      | -    | 0.75 | 0.30 | 0.19 | 0.79 | 0.33 | 0.66 | 0.17 | 0.80 | 0.29 | 0.35 | 0.04 | 0.69 | 0.08 | 0.27 | 0.69 | 0.22 | 0.25 | 0.29 | 0.23 | 0.74 | 0.09 | 0.26 | 0.11 | 0.21 | 0.60 | 0.73 | 0.91 | 0.91 | 0.75 | 0.07 | 0.75 | 0.90 | V3v  |      |    |
| V4v |   |      |      |      |      |      |      |      |      |      | -    | 0.03 | 0.02 | 0.28 | 0.07 | 0.07 | 0.28 | 0.93 | 0.06 | 0.08 | 0.25 | 0.93 | 0.11 | 0.77 | 0.86 | 0.04 | 0.03 | 0.06 | 0.02 | 0.93 | 0.82 | 0.74 | 0.15 | 0.10 | 0.83 | 0.58 | 0.99 | 0.99 | 0.61 | 0.16 | 0.11 | 0.50 | 0.69 | V4v  |    |
| FG1 |   |      |      |      |      |      |      |      |      |      |      | -    | 0.31 | 0.94 | 0.08 | 0.50 | 0.18 | 0.55 | 0.07 | 0.08 | 0.06 | 0.90 | 0.03 | 0.41 | 0.47 | 0.06 | 0.80 | 0.07 | 0.57 | 0.19 | 0.23 | 0.03 | 0.03 | 0.27 | 0.57 | 0.82 | 0.41 | 0.51 | 0.89 | 0.03 | 0.39 | 0.67 | 0.63 | FG1  |    |
| FG2 |   |      |      |      |      |      |      |      |      |      |      |      | -    | 0.86 | 0.03 | 0.64 | 0.07 | 0.20 | 0.03 | 0.03 | 0.05 | 0.98 | 0.02 | 0.29 | 0.34 | 0.03 | 0.15 | 0.03 | 0.19 | 0.13 | 0.16 | 0.04 | 0.02 | 0.12 | 0.44 | 0.52 | 0.29 | 0.39 | 0.58 | 0.34 | 0.03 | 0.38 | 0.40 | FG2  |    |
| 37B |   |      |      |      |      |      |      |      |      |      |      |      |      | -    | 0.78 | 0.72 | 0.08 | 0.72 | 0.44 | 0.81 | 0.73 | 0.51 | 0.67 | 0.09 | 0.37 | 0.12 | 0.51 | 0.48 | 0.18 | 0.13 | 0.42 | 0.37 | 0.12 | 0.31 | 0.71 | 0.59 | 0.34 | 0.51 | 0.49 | 0.03 | 0.28 | 0.55 | 0.52 | 37B  |    |
| 37L |   |      |      |      |      |      |      |      |      |      |      |      |      |      | -    | 0.78 | 0.06 | 0.33 | 0.78 | 0.83 | 0.95 | 0.85 | 0.05 | 0.61 | 0.92 | 0.33 | 0.28 | 0.61 | 0.72 | 0.42 | 0.74 | 0.05 | 0.03 | 0.19 | 0.78 | 0.37 | 0.73 | 0.78 | 0.37 | 0.96 | 0.15 | 0.30 | 0.40 | 37L  |    |
| 37M |   |      |      |      |      |      |      |      |      |      |      |      |      |      |      | -    | 0.08 | 0.53 | 0.45 | 0.96 | 0.15 | 0.76 | 0.06 | 0.64 | 0.34 | 0.15 | 0.56 | 0.49 | 0.46 | 0.09 | 0.45 | 0.81 | 0.07 | 0.15 | 0.35 | 0.99 | 0.07 | 0.36 | 0.62 | 0.40 | 0.22 | 0.72 | 0.82 | 37M  |    |
| 41  |   |      |      |      |      |      |      |      |      |      |      |      |      |      |      |      | -    | 0.12 | 0.07 | 0.11 | 0.17 | 0.04 | 0.03 | 0.06 | 0.15 | 0.05 | 0.11 | 0.24 | 0.20 | 0.14 | 0.24 | 0.19 | 0.10 | 0.03 | 0.04 | 0.03 | 0.05 | 0.10 | 0.08 | 0.13 | 0.06 | 0.01 | 0.03 | 41   |    |
| 42  |   |      |      |      |      |      |      |      |      |      |      |      |      |      |      |      |      | -    | 0.42 | 0.75 | 0.56 | 0.25 | 0.19 | 0.99 | 0.84 | 0.29 | 0.34 | 0.26 | 0.53 | 0.49 | 0.71 | 0.88 | 0.04 | 0.50 | 0.35 | 0.26 | 0.78 | 0.35 | 0.33 | 0.09 | 0.06 | 0.35 | 0.12 | 42   |    |
| 20  |   |      |      |      |      |      |      |      |      |      |      |      |      |      |      |      |      |      | -    | 0.38 | 0.64 | 0.84 | 0.05 | 0.55 | 0.97 | 0.07 | 0.94 | 0.67 | 0.17 | 0.35 | 0.63 | 0.05 | 0.02 | 0.22 | 0.73 | 0.34 | 0.66 | 0.72 | 0.34 | 0.39 | 0.18 | 0.28 | 0.37 | 20   |    |
| 21  |   |      |      |      |      |      |      |      |      |      |      |      |      |      |      |      |      |      |      | -    | 0.80 | 0.86 | 0.06 | 0.63 | 0.99 | 0.05 | 0.72 | 0.65 | 0.67 | 0.45 | 0.78 | 0.10 | 0.02 | 0.31 | 0.79 | 0.38 | 0.75 | 0.79 | 0.37 | 0.75 | 0.14 | 0.31 | 0.41 | 21   |    |
| 22  |   |      |      |      |      |      |      |      |      |      |      |      |      |      |      |      |      |      |      |      | -    | 0.53 | 0.06 | 0.04 | 0.56 | 0.22 | 0.06 | 0.08 | 0.05 | 0.35 | 0.44 | 0.15 | 0.03 | 0.22 | 0.85 | 0.15 | 0.54 | 0.44 | 0.21 | 0.05 | 0.44 | 0.15 | 0.20 | 22   |    |
| 36  |   |      |      |      |      |      |      |      |      |      |      |      |      |      |      |      |      |      |      |      |      | -    | 0.19 | 0.29 | 0.10 | 0.78 | 0.95 | 0.83 | 0.85 | 0.58 | 0.17 | 0.70 | 0.06 | 0.64 | 0.63 | 0.94 | 0.10 | 0.46 | 0.89 | 0.16 | 0.37 | 0.97 | 0.58 | 36   |    |
| 38  |   |      |      |      |      |      |      |      |      |      |      |      |      |      |      |      |      |      |      |      |      |      | -    | 0.10 | 0.11 | 0.03 | 0.02 | 0.04 | 0.02 | 0.10 | 0.07 | 0.06 | 0.05 | 0.30 | 0.12 | 0.08 | 0.09 | 0.10 | 0.08 | 0.05 | 0.11 | 0.08 | 0.08 | 38   |    |
| 5L  |   |      |      |      |      |      |      |      |      |      |      |      |      |      |      |      |      |      |      |      |      |      |      | -    | 0.91 | 0.43 | 0.36 | 0.62 | 0.34 | 0.38 | 0.12 | 0.85 | 0.03 | 0.40 | 1.00 | 0.54 | 0.55 | 0.73 | 0.47 | 0.43 | 0.33 | 0.61 | 0.63 | 5L   |    |
| 5M  |   |      |      |      |      |      |      |      |      |      |      |      |      |      |      |      |      |      |      |      |      |      |      |      | -    | 0.88 | 0.42 | 0.72 | 0.42 | 0.58 | 0.98 | 0.38 | 0.22 | 0.28 | 0.15 | 0.42 | 0.56 | 0.65 | 0.59 | 0.28 | 0.36 | 0.62 | 0.34 | 5M   |    |
| PGa |   |      |      |      |      |      |      |      |      |      |      |      |      |      |      |      |      |      |      |      |      |      |      |      |      | -    | 0.09 | 0.19 | 0.51 | 0.23 | 0.41 | 0.03 | 0.03 | 0.19 | 0.61 | 0.29 | 0.51 | 0.59 | 0.29 | 0.12 | 0.51 | 0.23 | 0.30 | PGa  |    |
| PGp |   |      |      |      |      |      |      |      |      |      |      |      |      |      |      |      |      |      |      |      |      |      |      |      |      |      | -    | 0.30 | 0.09 | 0.16 | 0.20 | 0.03 | 0.03 | 0.19 | 0.52 | 0.70 | 0.36 | 0.47 | 0.78 | 0.03 | 0.04 | 0.55 | 0.53 | PGp  |    |
| Pft |   |      |      |      |      |      |      |      |      |      |      |      |      |      |      |      |      |      |      |      |      |      |      |      |      |      |      | -    | 0.69 | 0.35 | 0.68 | 0.78 | 0.14 | 0.26 | 0.73 | 0.34 | 0.66 | 0.72 | 0.34 | 0.07 | 0.18 | 0.28 | 0.37 | Pft  |    |
| PFm |   |      |      |      |      |      |      |      |      |      |      |      |      |      |      |      |      |      |      |      |      |      |      |      |      |      |      |      | -    | 0.15 | 0.19 | 0.02 | 0.03 | 0.33 | 0.50 | 0.65 | 0.34 | 0.44 | 0.72 | 0.03 | 0.06 | 0.50 | 0.49 | PFm  |    |
| 32  |   |      |      |      |      |      |      |      |      |      |      |      |      |      |      |      |      |      |      |      |      |      |      |      |      |      |      |      |      | -    | 0.40 | 0.94 | 0.02 | 0.03 | 0.38 | 0.61 | 0.19 | 0.24 | 0.48 | 0.09 | 0.14 | 0.87 | 0.26 | 0.26 | 32 |
| 23  |   |      |      |      |      |      |      |      |      |      |      |      |      |      |      |      |      |      |      |      |      |      |      |      |      |      |      |      |      |      | -    | 0.77 | 0.01 | 0.34 | 0.79 | 0.53 | 0.97 | 0.98 | 0.57 | 0.06 | 0.05 | 0.51 | 0.63 | 23   |    |
| 31  |   |      |      |      |      |      |      |      |      |      |      |      |      |      |      |      |      |      |      |      |      |      |      |      |      |      |      |      |      |      |      | -    | 0.05 | 0.08 | 0.87 | 0.73 | 0.97 | 0.95 | 0.68 | 0.04 | 0.21 | 0.72 | 0.76 | 31   |    |
| 4   |   |      |      |      |      |      |      |      |      |      |      |      |      |      |      |      |      |      |      |      |      |      |      |      |      |      |      |      |      |      |      |      | -    | 0.29 | 0.03 | 0.02 | 0.02 | 0.08 | 0.02 | 0.14 | 0.06 | 0.02 | 0.02 | 0.02 | 4  |
| 6   |   |      |      |      |      |      |      |      |      |      |      |      |      |      |      |      |      |      |      |      |      |      |      |      |      |      |      |      |      |      |      |      |      | -    | 0.45 | 0.21 | 0.08 | 0.27 | 0.04 | 0.02 | 0.02 | 0.28 | 0.21 | 6    |    |
| 8   |   |      |      |      |      |      |      |      |      |      |      |      |      |      |      |      |      |      |      |      |      |      |      |      |      |      |      |      |      |      |      |      |      |      | -    | 0.02 | 0.51 | 0.28 | 0.24 | 0.10 | 0.10 | 0.19 | 0.04 | 8    |    |
| 9   |   |      |      |      |      |      |      |      |      |      |      |      |      |      |      |      |      |      |      |      |      |      |      |      |      |      |      |      |      |      |      |      |      |      |      | -    | 0.37 | 0.20 | 0.97 | 0.07 | 0.09 | 0.74 | 0.06 | 9    |    |
| 10L |   |      |      |      |      |      |      |      |      |      |      |      |      |      |      |      |      |      |      |      |      |      |      |      |      |      |      |      |      |      |      |      |      |      |      |      | -    | 0.99 | 0.02 | 0.08 | 0.90 | 0.52 | 0.53 | 10L  |    |
| 10M |   |      |      |      |      |      |      |      |      |      |      |      |      |      |      |      |      |      |      |      |      |      |      |      |      |      |      |      |      |      |      |      |      |      |      |      |      | -    | 0.29 | 0.08 | 0.20 | 0.45 | 0.33 | 10M  |    |
| 11  |   |      |      |      |      |      |      |      |      |      |      |      |      |      |      |      |      |      |      |      |      |      |      |      |      |      |      |      |      |      |      |      |      |      |      |      |      | -    | 0.14 | 0.11 | 0.88 | 0.68 | 11   |      |    |
| 44  |   |      |      |      |      |      |      |      |      |      |      |      |      |      |      |      |      |      |      |      |      |      |      |      |      |      |      |      |      |      |      |      |      |      |      |      |      |      |      |      |      |      |      |      |    |
