# Supplementary material for: Multiple Transmitter Receptors in Regions and Layers of the Human Cerebral Cortex
Source: PubMed Central journal article supplement (PMC5609104; doi:10.3389/fnana.2017.00078), 2017-09-20
Supplement: Table_1.pdf [file Table_1.pdf]

### Supplementary Table 1:

Summary of incubation conditions for receptor autoradiography. \* substance only present in the main incubation buffer.

| Transmitter   | Receptor<br>(characteristics)                                          | Ligand<br>(pharmacological<br>class)<br>[nM]           | Displacer<br>[μM]           | Incubation buffer                                                                                                | Pre-<br>incubation | Main<br>incubation | Final rinsing                                                                |
|---------------|------------------------------------------------------------------------|--------------------------------------------------------|-----------------------------|------------------------------------------------------------------------------------------------------------------|--------------------|--------------------|------------------------------------------------------------------------------|
| Glutamate     | AMPA<br>(ionotropic,<br>excitatory)                                    | [ <sup>3</sup> H]-AMPA<br>(agonist)<br>[10.0]          | Quisqualate<br>[10]         | 50mM Tris-acetate (pH 7.2)<br>+ 100 mM KSCN*                                                                     | 3x 10 min,<br>4° C | 45 min,<br>4° C    | 1) 4x 4sec<br>2) Acetone/glutaraldehyde (100<br>ml + 2,5 ml), 2x 2sec, 4° C  |
|               | NMDA<br>(ionotropic,<br>excitatory)                                    | [ <sup>3</sup> H]-MK-801<br>(antagonist)<br>[3.3]      | (+)-MK-801<br>[100]         | 50mM Tris-acetate (pH 7.2)<br>+ 50 μM glutamate<br>+30 μM glycine*<br>+ 50 μM spermidine*                        | 15 min,<br>4° C    | 60 min,<br>22° C   | 1) 2x 5min, 4° C<br>2) distilled water, 1x, 22° C                            |
|               | Kainate<br>(ionotropic,<br>excitatory)                                 | [ <sup>3</sup> H]-Kainate<br>(agonist)<br>[9.4]        | SYM 2081<br>[100]           | 50mM Tris-acetate (pH 7.1)<br>+10 mM Ca <sup>2+</sup> -acetate*                                                  | 3x 10 min,<br>4° C | 45 min,<br>4° C    | 1) 3x 4sec<br>2) Acetone/glutaraldehyde (100<br>ml + 2,5 ml), 2x 2sec, 22° C |
| GABA          | GABA <sub>A</sub><br>(ionotropic,<br>inhibitory)                       | [ <sup>3</sup> H]-Muscimol<br>(agonist)<br>[7.7]       | GABA<br>[10]                | 50mM Tris-citrate (pH 7.0)                                                                                       | 3 x 5 min,<br>4° C | 40 min,<br>4° C    | 1) 3x 3 sec, 4° C<br>2) distilled water, 1x, 22° C                           |
|               | GABA <sub>A</sub> /BZ<br>(ionotropic,<br>inhibitory)                   | [ <sup>3</sup> H]-Flumazenil<br>(antagonist)<br>[1.0]  | Clonazepam<br>[2]           | 170 mM Tris-HCl (pH 7.4)                                                                                         | 15 min,<br>4° C    | 60 min,<br>4° C    | 1) 2x 1 min, 4° C<br>2) distilled water, 1x, 22° C                           |
|               | GABA <sub>B</sub><br>(metabotropic,<br>inhibitory)                     | [ <sup>3</sup> H]-CGP 54626<br>(antagonist)<br>[2.0]   | CGP 55845<br>[100]          | 50mM Tris-HCl (pH 7.2)<br>+ 2,5 mM CaCl <sub>2</sub>                                                             | 3 x 5 min,<br>4° C | 60 min,<br>4° C    | 1) 3x 2 sec, 4° C<br>2) distilled water, 1x, 22° C                           |
| Acetylcholine | M <sub>1</sub><br>(metabotropic,<br>excitatory)                        | [ <sup>3</sup> H]-Pirenzepine<br>(antagonist)<br>[1.0] | Pirenzepine<br>[2]          | Modified Krebs buffer (pH 7.4)                                                                                   | 15 min,<br>4° C    | 60 min,<br>4° C    | 1) 2x 1 min, 4° C<br>2) distilled water, 1 x, 22° C                          |
|               | M <sub>2</sub><br>(metabotropic,<br>inhibitory)                        | [ <sup>3</sup> H]-Oxotremorine-M<br>(agonist)<br>[1.7] | Carbachol<br>[10]           | 20 mM HEPES-Tris (pH 7.5)<br>+ 10 mM MgCl <sub>2</sub><br>+ 300 nM Pirenzepine                                   | 20 min,<br>22° C   | 60 min,<br>22° C   | 1) 2x 2 min, 4° C<br>2) distilled water, 1 x, 22° C                          |
|               | M <sub>3</sub><br>(ionotropic,<br>excitatory)                          | [ <sup>3</sup> H]-4-DAMP<br>(antagonist)<br>[1.0]      | Atropine<br>sulfate<br>[10] | 50 mM Tris-HCl (pH 7.4)<br>+ 0.1 mM PSMF<br>+ 1mM EDTA                                                           | 15 min,<br>22° C   | 45 min,<br>22° C   | 1) 2x 5 min, 4° C<br>2) distilled water, 1 x, 22° C                          |
|               | nicotinic α <sub>4</sub> β <sub>2</sub><br>(ionotropic,<br>excitatory) | [ <sup>3</sup> H]-Epibatidine<br>(agonist)<br>[0.5]    | Nicotine<br>[100]           | 15mM HEPES (pH 7.5)<br>+ 120 mM NaCl<br>+ 5.4 mM KCl<br>+ 0.8 mM MgCl <sub>2</sub><br>+ 1.8 mM CaCl <sub>2</sub> | 20 min,<br>22° C   | 90 min,<br>22° C   | 1) 5 min, 4° C<br>2) distilled water, 1 x, 22° C                             |

|               |                                                     |                                                        |                                  |                                                                                                                |                  |                   |                                                      |
|---------------|-----------------------------------------------------|--------------------------------------------------------|----------------------------------|----------------------------------------------------------------------------------------------------------------|------------------|-------------------|------------------------------------------------------|
| Noradrenaline | $\alpha_1$<br>(metabotropic,<br>excitatory)         | [ <sup>3</sup> H]-Prazosin<br>(antagonist)<br>[0.2]    | Phentolamine<br>Mesylate<br>[10] | 50mM Na/K-phosphate buffer (pH 7.4)                                                                            | 15 min,<br>22° C | 60 min,<br>22° C  | 1) 2x 5 min, 4° C<br>2) distilled water, 1 x, 22° C  |
|               | $\alpha_2$<br>(metabotropic,<br>inhibitory)         | [ <sup>3</sup> H]-UK 14,304<br>(agonist)<br>[0.64]     | Phentolamine<br>Mesylate<br>[10] | 50 mM Tris-HCl (pH 7.7)<br>+ 100 $\mu$ M MnCl <sub>2</sub>                                                     | 15 min,<br>22° C | 90 min,<br>22° C  | 1) 5 min, 4° C<br>2) distilled water, 1 x, 22° C     |
| Serotonin     | 5-HT <sub>1A</sub><br>(metabotropic,<br>inhibitory) | [ <sup>3</sup> H]-8-OH-DPAT<br>(agonist)<br>[1.0]      | 5-Hydroxy-<br>tryptamine,<br>[1] | 170 mM Tris-HCl (pH 7.4)<br>+4 mM CaCl <sub>2</sub> *<br>+ 0.01% ascorbate*                                    | 30 min,<br>22° C | 60 min,<br>22° C  | 1) 5 min, 4° C<br>2) distilled water, 3 x, 22° C     |
|               | 5-HT <sub>2</sub><br>(metabotropic,<br>excitatory)  | [ <sup>3</sup> H]-Ketanserin<br>(antagonist)<br>[1.14] | Mianserin<br>[10]                | 170 mM Tris-HCl (pH 7.7)                                                                                       | 30 min,<br>22° C | 120 min,<br>22° C | 1) 2x 10 min, 4° C<br>2) distilled water, 3 x, 22° C |
| Dopamine      | D <sub>1</sub><br>(metabotropic,<br>excitatory)     | [ <sup>3</sup> H]-SCH 23390<br>(antagonist)<br>[1.67]  | SKF 83566<br>[1]                 | 50 mM Tris-HCl (pH 7.4)<br>+ 120 mM NaCl<br>+ 5 mM KCl<br>+ 2 mM CaCl <sub>2</sub><br>+ 1 mM MgCl <sub>2</sub> | 20 min,<br>22° C | 90 min,<br>22° C  | 1) 2x 20 min, 4° C<br>2) distilled water, 1 x, 22° C |
