# Supplementary material for: Multiple Transmitter Receptors in Regions and Layers of the Human Cerebral Cortex
Source: PubMed Central journal article supplement (PMC5609104; doi:10.3389/fnana.2017.00078), 2017-09-20
Supplement: Table_2.pdf [file Table_2.pdf]

### Supplementary Table 2:

Receptor densities in the supragranular, granular and infragranular strata as well as averaged over all layers in the 44 cortical areas. Primary sensory areas are highlighted in yellow, the primary motor cortex in grey. Data is presented a mean densities (in fmol/mg protein) over all examined areas, standard deviation (SD) and variation coefficients (VC)

| Region     | AMPA          |       |       |          |       |       |               |       |       |            |       |       |
|------------|---------------|-------|-------|----------|-------|-------|---------------|-------|-------|------------|-------|-------|
|            | supragranular | (SD)  | CV    | granular | (SD)  | CV    | infragranular | (SD)  | CV    | all layers | (SD)  | CV    |
| <b>1</b>   | 518           | (220) | 0.424 | 346      | (152) | 0.440 | 354           | (156) | 0.442 | 443        | (191) | 0.430 |
| <b>2</b>   | 549           | (228) | 0.416 | 424      | (169) | 0.400 | 365           | (136) | 0.373 | 478        | (197) | 0.412 |
| <b>3a</b>  | 564           | (164) | 0.291 | 389      | (110) | 0.281 | 334           | (93)  | 0.279 | 473        | (145) | 0.306 |
| <b>3b</b>  | 538           | (216) | 0.402 | 350      | (144) | 0.412 | 324           | (133) | 0.411 | 455        | (179) | 0.393 |
| <b>V1</b>  | 606           | (344) | 0.567 | 406      | (169) | 0.415 | 276           | (121) | 0.439 | 496        | (274) | 0.412 |
| <b>V2d</b> | 569           | (290) | 0.509 | 373      | (116) | 0.310 | 333           | (136) | 0.407 | 451        | (206) | 0.309 |
| <b>V2v</b> | 605           | (177) | 0.293 | 416      | (18)  | 0.044 | 350           | (23)  | 0.064 | 472        | (58)  | 0.287 |
| <b>V3A</b> | 639           | (271) | 0.424 | 414      | (110) | 0.266 | 425           | (56)  | 0.133 | 534        | (169) | 0.365 |
| <b>V3d</b> | 583           | (245) | 0.420 | 380      | (139) | 0.367 | 324           | (130) | 0.401 | 478        | (198) | 0.347 |
| <b>V3v</b> | 611           | (201) | 0.330 | 414      | (49)  | 0.118 | 333           | (106) | 0.319 | 477        | (118) | 0.265 |
| <b>V4v</b> | 507           | (56)  | 0.111 | 376      | (6)   | 0.016 | 271           | (53)  | 0.194 | 383        | (58)  | 0.309 |
| <b>FG1</b> | 740           | (56)  | 0.076 | 548      | (24)  | 0.043 | 504           | (29)  | 0.058 | 623        | (41)  | 0.066 |
| <b>FG2</b> | 780           | (122) | 0.156 | 620      | (12)  | 0.020 | 552           | (56)  | 0.101 | 656        | (66)  | 0.101 |
| <b>37B</b> | 582           | (162) | 0.278 | 485      | (137) | 0.282 | 478           | (138) | 0.289 | 533        | (148) | 0.278 |
| <b>37L</b> | 564           | (181) | 0.116 | 444      | (151) | 0.196 | 438           | (151) | 0.203 | 506        | (170) | 0.149 |
| <b>37M</b> | 586           | (271) | 0.227 | 460      | (209) | 0.212 | 446           | (206) | 0.192 | 513        | (240) | 0.213 |
| <b>41</b>  | 561           | (187) | 0.333 | 368      | (124) | 0.338 | 367           | (119) | 0.326 | 479        | (164) | 0.342 |
| <b>42</b>  | 568           | (179) | 0.315 | 419      | (123) | 0.293 | 395           | (103) | 0.260 | 498        | (152) | 0.304 |
| <b>20</b>  | 624           | (285) | 0.316 | 570      | (247) | 0.423 | 537           | (248) | 0.471 | 584        | (259) | 0.366 |
| <b>21</b>  | 669           | (311) | 0.465 | 590      | (268) | 0.454 | 554           | (259) | 0.468 | 618        | (289) | 0.468 |
| <b>22</b>  | 583           | (332) | 0.570 | 444      | (219) | 0.492 | 408           | (179) | 0.439 | 506        | (263) | 0.520 |
| <b>36</b>  | 679           | (306) | 0.445 | 606      | (252) | 0.428 | 601           | (250) | 0.420 | 638        | (275) | 0.421 |
| <b>38</b>  | 735           | (645) | 0.006 | 721      | (586) | 0.013 | 687           | (561) | 0.068 | 715        | (606) | 0.031 |
| <b>5L</b>  | 403           | (123) | 0.306 | 335      | (89)  | 0.266 | 313           | (97)  | 0.309 | 366        | (115) | 0.314 |

|            |     |       |       |     |       |       |     |       |       |     |       |       |
|------------|-----|-------|-------|-----|-------|-------|-----|-------|-------|-----|-------|-------|
| <b>5M</b>  | 413 | (90)  | 0.218 | 337 | (99)  | 0.295 | 338 | (107) | 0.316 | 382 | (99)  | 0.259 |
| <b>PGa</b> | 414 | (74)  | 0.178 | 336 | (62)  | 0.183 | 334 | (64)  | 0.191 | 377 | (62)  | 0.166 |
| <b>PGp</b> | 451 | (182) | 0.176 | 391 | (166) | 0.193 | 384 | (165) | 0.175 | 421 | (176) | 0.179 |
| <b>PFt</b> | 531 | (177) | 0.279 | 448 | (138) | 0.257 | 438 | (130) | 0.200 | 485 | (157) | 0.241 |
| <b>PFm</b> | 561 | (148) | 0.265 | 469 | (96)  | 0.205 | 457 | (120) | 0.263 | 513 | (134) | 0.261 |
| <b>24</b>  | 546 | (40)  | 0.074 | --  | --    | --    | 467 | (16)  | 0.035 | 509 | (24)  | 0.046 |
| <b>32</b>  | 410 | (50)  | 0.122 | 372 | (40)  | 0.106 | 346 | (19)  | 0.056 | 383 | (36)  | 0.094 |
| <b>23</b>  | 407 | (141) | 0.347 | 318 | (101) | 0.316 | 300 | (68)  | 0.226 | 364 | (114) | 0.313 |
| <b>31</b>  | 439 | (140) | 0.320 | 361 | (141) | 0.391 | 354 | (133) | 0.377 | 400 | (139) | 0.346 |
| <b>4</b>   | 404 | (73)  | 0.361 | 272 | (30)  | 0.226 | 224 | (9)   | 0.446 | 286 | (40)  | 0.393 |
| <b>6</b>   | 336 | (82)  | 0.189 | 290 | (99)  | 0.280 | 272 | (106) | 0.246 | 301 | (97)  | 0.214 |
| <b>8</b>   | 690 | (431) | 0.399 | 649 | (480) | 0.412 | 603 | (456) | 0.433 | 654 | (444) | 0.405 |
| <b>9</b>   | 675 | (151) | 0.220 | 631 | (245) | 0.200 | 608 | (204) | 0.179 | 647 | (176) | 0.203 |
| <b>10L</b> | 695 | (486) | 0.276 | 636 | (474) | 0.274 | 623 | (499) | 0.335 | 663 | (490) | 0.291 |
| <b>10M</b> | 714 | (565) | 0.411 | 710 | (596) | 0.370 | 715 | (640) | 0.426 | 714 | (596) | 0.406 |
| <b>11</b>  | 811 | (42)  | 0.212 | 754 | (43)  | 0.208 | 764 | (49)  | 0.166 | 791 | (44)  | 0.204 |
| <b>44</b>  | 602 | (128) | 0.229 | 487 | (51)  | 0.031 | 468 | (25)  | 0.015 | 492 | (70)  | 0.151 |
| <b>45</b>  | 524 | (419) | 0.018 | 415 | (324) | 0.069 | 393 | (305) | 0.011 | 472 | (379) | 0.028 |
| <b>46</b>  | 693 | (188) | 0.271 | 595 | (204) | 0.342 | 585 | (202) | 0.346 | 644 | (195) | 0.302 |
| <b>47</b>  | 718 | (345) | 0.257 | 640 | (320) | 0.193 | 651 | (334) | 0.186 | 689 | (335) | 0.233 |

| Region     | NMDA          |       |       |          |       |       |               |       |       |            |       |       |
|------------|---------------|-------|-------|----------|-------|-------|---------------|-------|-------|------------|-------|-------|
|            | supragranular | (SD)  | CV    | granular | (SD)  | CV    | infragranular | (SD)  | CV    | all layers | (SD)  | CV    |
| <b>1</b>   | 1369          | (262) | 0.192 | 1003     | (208) | 0.207 | 862           | (190) | 0.221 | 1169       | (246) | 0.210 |
| <b>2</b>   | 1450          | (246) | 0.190 | 1189     | (224) | 0.160 | 943           | (189) | 0.169 | 1271       | (225) | 0.188 |
| <b>3a</b>  | 1352          | (303) | 0.195 | 1114     | (253) | 0.193 | 863           | (195) | 0.198 | 1178       | (280) | 0.198 |
| <b>3b</b>  | 1438          | (266) | 0.185 | 1182     | (210) | 0.178 | 878           | (132) | 0.151 | 1254       | (203) | 0.162 |
| <b>V1</b>  | 1963          | (429) | 0.219 | 1769     | (366) | 0.207 | 991           | (116) | 0.117 | 1735       | (394) | 0.238 |
| <b>V2d</b> | 1785          | (386) | 0.216 | 1500     | (295) | 0.197 | 1061          | (183) | 0.172 | 1450       | (280) | 0.178 |
| <b>V2v</b> | 1759          | (202) | 0.115 | 1523     | (243) | 0.160 | 1065          | (199) | 0.187 | 1449       | (81)  | 0.141 |

|            |      |        |       |      |        |       |      |        |       |      |        |       |
|------------|------|--------|-------|------|--------|-------|------|--------|-------|------|--------|-------|
| <b>V3A</b> | 1759 | (350)  | 0.199 | 1451 | (192)  | 0.132 | 1215 | (232)  | 0.191 | 1526 | (267)  | 0.227 |
| <b>V3d</b> | 1599 | (519)  | 0.325 | 1247 | (339)  | 0.272 | 979  | (249)  | 0.254 | 1361 | (411)  | 0.216 |
| <b>V3v</b> | 1784 | (318)  | 0.178 | 1607 | (329)  | 0.205 | 1111 | (251)  | 0.226 | 1496 | (215)  | 0.178 |
| <b>V4v</b> | 1545 | (303)  | 0.196 | 1479 | (391)  | 0.264 | 945  | (292)  | 0.309 | 1248 | (328)  | 0.157 |
| <b>FG1</b> | 1503 | (381)  | 0.254 | 1337 | (638)  | 0.477 | 1019 | (636)  | 0.624 | 1279 | (509)  | 0.398 |
| <b>FG2</b> | 1699 | (463)  | 0.272 | 1425 | (717)  | 0.503 | 1089 | (593)  | 0.545 | 1382 | (586)  | 0.424 |
| <b>37B</b> | 1423 | (406)  | 0.285 | 1235 | (413)  | 0.334 | 1009 | (326)  | 0.323 | 1251 | (382)  | 0.306 |
| <b>37L</b> | 1500 | (430)  | 0.287 | 1258 | (356)  | 0.283 | 1048 | (310)  | 0.296 | 1312 | (382)  | 0.291 |
| <b>37M</b> | 1589 | (556)  | 0.274 | 1398 | (503)  | 0.268 | 1110 | (410)  | 0.240 | 1379 | (514)  | 0.268 |
| <b>41</b>  | 1498 | (361)  | 0.241 | 1145 | (325)  | 0.284 | 867  | (234)  | 0.270 | 1266 | (314)  | 0.248 |
| <b>42</b>  | 1506 | (287)  | 0.190 | 1136 | (237)  | 0.209 | 873  | (202)  | 0.232 | 1272 | (266)  | 0.209 |
| <b>20</b>  | 1387 | (329)  | 0.122 | 1269 | (329)  | 0.149 | 1089 | (352)  | 0.236 | 1257 | (322)  | 0.146 |
| <b>21</b>  | 1453 | (575)  | 0.290 | 1272 | (521)  | 0.287 | 1128 | (464)  | 0.280 | 1314 | (525)  | 0.289 |
| <b>22</b>  | 1408 | (338)  | 0.240 | 1126 | (267)  | 0.237 | 935  | (230)  | 0.246 | 1212 | (287)  | 0.237 |
| <b>36</b>  | 1460 | (394)  | 0.269 | 1374 | (400)  | 0.291 | 1187 | (336)  | 0.283 | 1343 | (369)  | 0.275 |
| <b>38</b>  | 1591 | (325)  | 0.204 | 1429 | (114)  | 0.079 | 1225 | (43)   | 0.035 | 1432 | (169)  | 0.118 |
| <b>5L</b>  | 1244 | (451)  | 0.070 | 1054 | (360)  | 0.089 | 851  | (224)  | 0.134 | 1095 | (360)  | 0.055 |
| <b>5M</b>  | 1113 | (198)  | 0.178 | 948  | (172)  | 0.181 | 811  | (166)  | 0.204 | 1000 | (181)  | 0.181 |
| <b>PGa</b> | 1341 | (415)  | 0.310 | 1129 | (396)  | 0.350 | 960  | (346)  | 0.360 | 1187 | (395)  | 0.333 |
| <b>PGp</b> | 1372 | (361)  | 0.263 | 1176 | (287)  | 0.244 | 969  | (190)  | 0.196 | 1214 | (306)  | 0.253 |
| <b>PFt</b> | 1327 | (263)  | 0.198 | 1121 | (312)  | 0.279 | 968  | (307)  | 0.318 | 1162 | (283)  | 0.243 |
| <b>PFm</b> | 1434 | (340)  | 0.237 | 1188 | (343)  | 0.289 | 982  | (292)  | 0.298 | 1244 | (311)  | 0.250 |
| <b>24</b>  | 1622 | (1369) | 0.046 | --   | --     | --    | 1329 | (1117) | 0.035 | 1478 | (1241) | 0.025 |
| <b>32</b>  | 1421 | (1277) | 0.074 | 1352 | (1192) | 0.036 | 1122 | (928)  | 0.050 | 1299 | (1126) | 0.070 |
| <b>23</b>  | 1302 | (380)  | 0.292 | 1068 | (389)  | 0.364 | 875  | (331)  | 0.378 | 1137 | (334)  | 0.294 |
| <b>31</b>  | 1366 | (336)  | 0.246 | 1234 | (349)  | 0.282 | 1037 | (295)  | 0.284 | 1234 | (316)  | 0.256 |
| <b>4</b>   | 947  | (8)    | 0.119 | 776  | (53)   | 0.083 | 617  | (17)   | 0.109 | 739  | (1)    | 0.128 |
| <b>6</b>   | 873  | (104)  | 0.344 | 789  | (197)  | 0.053 | 633  | (153)  | 0.330 | 751  | (118)  | 0.351 |
| <b>8</b>   | 1421 | (1362) | 0.114 | 1227 | (1144) | 0.164 | 1054 | (938)  | 0.148 | 1255 | (1159) | 0.125 |
| <b>9</b>   | 1272 | (1261) | 0.163 | 1090 | (1017) | 0.175 | 933  | (834)  | 0.185 | 1123 | (1067) | 0.174 |

|            |      |        |       |      |        |       |      |        |       |      |        |       |
|------------|------|--------|-------|------|--------|-------|------|--------|-------|------|--------|-------|
| <b>10L</b> | 1102 | (1052) | 0.116 | 966  | (868)  | 0.066 | 861  | (753)  | 0.032 | 1006 | (934)  | 0.085 |
| <b>10M</b> | 1187 | (1232) | 0.001 | 1077 | (1036) | 0.041 | 934  | (886)  | 0.021 | 1079 | (1076) | 0.008 |
| <b>11</b>  | 1341 | (1372) | 0.001 | 1235 | (1231) | 0.003 | 1067 | (1036) | 0.035 | 1234 | (1236) | 0.010 |
| <b>44</b>  | 1097 | (169)  | 0.034 | 958  | (62)   | 0.073 | 856  | (55)   | 0.077 | 964  | (95)   | 0.050 |
| <b>45</b>  | 1191 | (37)   | 0.031 | 1092 | (28)   | 0.025 | 901  | (18)   | 0.021 | 1078 | (40)   | 0.038 |
| <b>46</b>  | 1211 | (1107) | 0.183 | 1014 | (874)  | 0.141 | 931  | (763)  | 0.167 | 1091 | (959)  | 0.174 |
| <b>47</b>  | 1115 | (913)  | 0.170 | 999  | (786)  | 0.124 | 901  | (691)  | 0.118 | 1033 | (818)  | 0.149 |

| Region     | kainate       |       |       |          |       |       |               |       |       |            |       |       |
|------------|---------------|-------|-------|----------|-------|-------|---------------|-------|-------|------------|-------|-------|
|            | supragranular | (SD)  | CV    | granular | (SD)  | CV    | infragranular | (SD)  | CV    | all layers | (SD)  | CV    |
| <b>1</b>   | 599           | (309) | 0.097 | 608      | (342) | 0.048 | 649           | (375) | 0.036 | 615        | (330) | 0.059 |
| <b>2</b>   | 591           | (282) | 0.307 | 640      | (342) | 0.394 | 669           | (386) | 0.338 | 625        | (323) | 0.313 |
| <b>3a</b>  | 598           | (356) | 0.445 | 598      | (410) | 0.517 | 590           | (416) | 0.577 | 593        | (378) | 0.496 |
| <b>3b</b>  | 526           | (286) | 0.378 | 529      | (332) | 0.536 | 644           | (395) | 0.507 | 560        | (325) | 0.439 |
| <b>V1</b>  | 297           | (333) | 1.124 | 417      | (477) | 1.144 | 304           | (335) | 1.102 | 329        | (367) | 0.889 |
| <b>V2d</b> | 310           | (344) | 1.110 | 359      | (416) | 1.157 | 320           | (335) | 1.048 | 318        | (346) | 0.860 |
| <b>V2v</b> | 295           | (321) | 1.091 | 305      | (348) | 1.142 | 422           | (509) | 1.204 | 366        | (425) | 0.907 |
| <b>V3A</b> | 354           | (399) | 1.128 | 408      | (488) | 1.197 | 397           | (453) | 1.140 | 376        | (429) | 0.923 |
| <b>V3d</b> | 370           | (431) | 1.164 | 492      | (598) | 1.216 | 340           | (373) | 1.094 | 369        | (424) | 0.914 |
| <b>V3v</b> | 323           | (351) | 1.088 | 344      | (384) | 1.117 | 461           | (547) | 1.188 | 391        | (448) | 0.920 |
| <b>V4v</b> | 308           | (335) | 1.086 | 352      | (358) | 1.018 | 417           | (452) | 1.083 | 362        | (390) | 0.848 |
| <b>FG1</b> | 413           | (230) | 0.556 | 429      | (216) | 0.504 | 524           | (369) | 0.704 | 462        | (90)  | 0.626 |
| <b>FG2</b> | 316           | (117) | 0.370 | 324      | (189) | 0.582 | 362           | (200) | 0.553 | 335        | (159) | 0.473 |
| <b>37B</b> | 454           | (279) | 0.300 | 581      | (429) | 0.332 | 594           | (363) | 0.265 | 519        | (330) | 0.289 |
| <b>37L</b> | 546           | (314) | 0.169 | 612      | (387) | 0.105 | 642           | (337) | 0.050 | 588        | (323) | 0.102 |
| <b>37M</b> | 530           | (307) | 0.150 | 582      | (300) | 0.036 | 642           | (355) | 0.076 | 577        | (320) | 0.082 |
| <b>41</b>  | 532           | (324) | 0.608 | 577      | (344) | 0.596 | 657           | (425) | 0.646 | 573        | (351) | 0.613 |
| <b>42</b>  | 583           | (291) | 0.415 | 626      | (374) | 0.500 | 666           | (387) | 0.414 | 615        | (327) | 0.420 |
| <b>20</b>  | 555           | (381) | 0.665 | 730      | (532) | 0.604 | 829           | (588) | 0.513 | 666        | (453) | 0.589 |
| <b>21</b>  | 665           | (366) | 0.327 | 794      | (484) | 0.287 | 876           | (517) | 0.296 | 762        | (438) | 0.314 |

|            |     |       |       |     |       |       |     |       |       |     |       |       |
|------------|-----|-------|-------|-----|-------|-------|-----|-------|-------|-----|-------|-------|
| <b>22</b>  | 623 | (352) | 0.244 | 714 | (408) | 0.186 | 745 | (439) | 0.151 | 675 | (386) | 0.198 |
| <b>36</b>  | 568 | (371) | 0.652 | 700 | (510) | 0.729 | 810 | (558) | 0.688 | 673 | (456) | 0.677 |
| <b>38</b>  | 402 | (238) | 0.148 | 493 | (289) | 0.018 | 626 | (360) | 0.071 | 496 | (294) | 0.092 |
| <b>5L</b>  | 422 | (289) | 0.477 | 448 | (349) | 0.410 | 476 | (354) | 0.402 | 441 | (315) | 0.440 |
| <b>5M</b>  | 368 | (186) | 0.230 | 409 | (285) | 0.455 | 417 | (337) | 0.562 | 388 | (245) | 0.370 |
| <b>PGa</b> | 490 | (302) | 0.138 | 577 | (360) | 0.096 | 645 | (387) | 0.087 | 553 | (334) | 0.111 |
| <b>PGp</b> | 477 | (374) | 0.558 | 564 | (451) | 0.509 | 570 | (420) | 0.509 | 519 | (397) | 0.531 |
| <b>PFt</b> | 414 | (192) | 0.424 | 509 | (255) | 0.401 | 532 | (249) | 0.318 | 469 | (217) | 0.379 |
| <b>PFm</b> | 484 | (337) | 0.336 | 559 | (394) | 0.287 | 585 | (415) | 0.266 | 532 | (373) | 0.283 |
| <b>24</b>  | 753 | (398) | 0.046 | --  | --    | --    | 914 | (466) | 0.083 | 829 | (434) | 0.050 |
| <b>32</b>  | 615 | (419) | 0.300 | 716 | (461) | 0.172 | 767 | (427) | 0.173 | 681 | (430) | 0.218 |
| <b>23</b>  | 504 | (227) | 0.451 | 530 | (227) | 0.429 | 606 | (320) | 0.528 | 541 | (260) | 0.481 |
| <b>31</b>  | 522 | (244) | 0.151 | 587 | (309) | 0.144 | 681 | (362) | 0.118 | 587 | (301) | 0.128 |
| <b>4</b>   | 346 | (50)  | 0.088 | 283 | (25)  | 0.149 | 257 | (20)  | 0.135 | 286 | (35)  | 0.102 |
| <b>6</b>   | 280 | (24)  | 0.143 | 296 | (17)  | 0.076 | 330 | (21)  | 0.184 | 305 | (21)  | 0.115 |
| <b>8</b>   | 593 | (461) | 0.259 | 705 | (509) | 0.240 | 780 | (496) | 0.217 | 677 | (489) | 0.225 |
| <b>9</b>   | 634 | (359) | 0.038 | 749 | (418) | 0.159 | 899 | (443) | 0.060 | 759 | (415) | 0.044 |
| <b>10L</b> | 562 | (303) | 0.162 | 727 | (339) | 0.227 | 828 | (398) | 0.166 | 673 | (336) | 0.180 |
| <b>10M</b> | 582 | (338) | 0.004 | 726 | (363) | 0.045 | 844 | (426) | 0.032 | 699 | (381) | 0.029 |
| <b>11</b>  | 654 | (386) | 0.009 | 838 | (475) | 0.049 | 923 | (503) | 0.035 | 766 | (444) | 0.018 |
| <b>44</b>  | 459 | (112) | 0.191 | 521 | (91)  | 0.091 | 601 | (78)  | 0.143 | 498 | (84)  | 0.163 |
| <b>45</b>  | 397 | (275) | 0.173 | 442 | (225) | 0.134 | 490 | (268) | 0.098 | 434 | (264) | 0.117 |
| <b>46</b>  | 592 | (316) | 0.125 | 716 | (336) | 0.076 | 800 | (333) | 0.066 | 676 | (327) | 0.087 |
| <b>47</b>  | 501 | (239) | 0.126 | 627 | (277) | 0.090 | 733 | (282) | 0.062 | 586 | (267) | 0.089 |

| Region    | GABA <sub>A</sub> |       |       |          |       |       |               |       |       |            |       |       |
|-----------|-------------------|-------|-------|----------|-------|-------|---------------|-------|-------|------------|-------|-------|
|           | supragranular     | (SD)  | CV    | granular | (SD)  | CV    | infragranular | (SD)  | CV    | all layers | (SD)  | CV    |
| <b>1</b>  | 2053              | (403) | 0.196 | 1296     | (319) | 0.246 | 791           | (219) | 0.277 | 1545       | (336) | 0.217 |
| <b>2</b>  | 2050              | (408) | 0.199 | 1594     | (415) | 0.261 | 985           | (304) | 0.308 | 1687       | (344) | 0.204 |
| <b>3a</b> | 2071              | (476) | 0.230 | 1456     | (408) | 0.280 | 836           | (269) | 0.322 | 1630       | (413) | 0.253 |

|            |      |        |       |      |        |       |      |       |       |      |        |       |
|------------|------|--------|-------|------|--------|-------|------|-------|-------|------|--------|-------|
| <b>3b</b>  | 2294 | (434)  | 0.189 | 1678 | (368)  | 0.219 | 864  | (232) | 0.268 | 1849 | (378)  | 0.204 |
| <b>V1</b>  | 3201 | (1494) | 0.470 | 2941 | (999)  | 0.341 | 794  | (100) | 0.127 | 2702 | (1178) | 0.319 |
| <b>V2d</b> | 2719 | (1181) | 0.434 | 1693 | (36)   | 0.021 | 846  | (116) | 0.137 | 1826 | (502)  | 0.216 |
| <b>V2v</b> | 3178 | (992)  | 0.310 | 2819 | (665)  | 0.236 | 1420 | (54)  | 0.038 | 2342 | (255)  | 0.226 |
| <b>V3A</b> | 2716 | (876)  | 0.323 | 2050 | (611)  | 0.298 | 1063 | (217) | 0.204 | 2016 | (522)  | 0.291 |
| <b>V3d</b> | 2759 | (1025) | 0.371 | 1983 | (333)  | 0.168 | 947  | (66)  | 0.070 | 2091 | (629)  | 0.258 |
| <b>V3v</b> | 3154 | (1006) | 0.319 | 2541 | (825)  | 0.325 | 1319 | (484) | 0.367 | 2338 | (570)  | 0.268 |
| <b>V4v</b> | 2768 | (829)  | 0.299 | 2931 | (1584) | 0.539 | 1509 | (959) | 0.636 | 2167 | (998)  | 0.350 |
| <b>FG1</b> | 1637 | (85)   | 0.052 | 1278 | (341)  | 0.267 | 831  | (454) | 0.546 | 1260 | (263)  | 0.208 |
| <b>FG2</b> | 1788 | (757)  | 0.424 | 1612 | (1080) | 0.670 | 938  | (736) | 0.784 | 1368 | (830)  | 0.606 |
| <b>37B</b> | 1928 | (216)  | 0.112 | 1791 | (274)  | 0.153 | 1163 | (170) | 0.146 | 1632 | (204)  | 0.125 |
| <b>37L</b> | 1881 | (588)  | 0.312 | 1486 | (420)  | 0.283 | 927  | (321) | 0.346 | 1509 | (483)  | 0.320 |
| <b>37M</b> | 1811 | (447)  | 0.247 | 1573 | (497)  | 0.316 | 912  | (402) | 0.441 | 1433 | (466)  | 0.325 |
| <b>41</b>  | 2205 | (609)  | 0.276 | 1651 | (687)  | 0.416 | 867  | (335) | 0.387 | 1724 | (520)  | 0.302 |
| <b>42</b>  | 1904 | (525)  | 0.276 | 1462 | (454)  | 0.310 | 959  | (149) | 0.155 | 1544 | (387)  | 0.251 |
| <b>20</b>  | 1684 | (490)  | 0.291 | 1614 | (486)  | 0.301 | 1076 | (264) | 0.245 | 1437 | (376)  | 0.262 |
| <b>21</b>  | 1925 | (468)  | 0.243 | 1803 | (469)  | 0.260 | 1208 | (295) | 0.244 | 1636 | (381)  | 0.233 |
| <b>22</b>  | 1890 | (535)  | 0.283 | 1349 | (310)  | 0.230 | 814  | (213) | 0.262 | 1452 | (343)  | 0.236 |
| <b>36</b>  | 1623 | (579)  | 0.356 | 1534 | (426)  | 0.278 | 1018 | (175) | 0.171 | 1366 | (377)  | 0.276 |
| <b>38</b>  | 1613 | (621)  | 0.385 | 1533 | (475)  | 0.310 | 1089 | (352) | 0.324 | 1406 | (495)  | 0.352 |
| <b>5L</b>  | 1952 | (758)  | 0.388 | 1533 | (685)  | 0.447 | 974  | (498) | 0.511 | 1626 | (662)  | 0.407 |
| <b>5M</b>  | 1844 | (727)  | 0.394 | 1354 | (645)  | 0.476 | 892  | (413) | 0.462 | 1463 | (555)  | 0.380 |
| <b>PGa</b> | 2030 | (607)  | 0.299 | 1684 | (525)  | 0.312 | 1114 | (410) | 0.368 | 1672 | (524)  | 0.313 |
| <b>PGp</b> | 2253 | (573)  | 0.254 | 1864 | (483)  | 0.259 | 1218 | (375) | 0.308 | 1848 | (482)  | 0.261 |
| <b>PFt</b> | 1787 | (512)  | 0.286 | 1389 | (365)  | 0.263 | 862  | (167) | 0.193 | 1369 | (285)  | 0.208 |
| <b>PFm</b> | 2112 | (270)  | 0.128 | 1638 | (358)  | 0.218 | 992  | (253) | 0.255 | 1649 | (229)  | 0.139 |
| <b>24</b>  | 1403 | (1095) | 0.264 | --   | --     | --    | 992  | (842) | 0.311 | 1197 | (955)  | 0.253 |
| <b>32</b>  | 1440 | (1120) | 0.778 | 1184 | (815)  | 0.688 | 781  | (527) | 0.676 | 1164 | (838)  | 0.720 |
| <b>23</b>  | 2187 | (551)  | 0.252 | 1472 | (427)  | 0.290 | 836  | (257) | 0.308 | 1671 | (402)  | 0.241 |
| <b>31</b>  | 2087 | (530)  | 0.254 | 1805 | (524)  | 0.291 | 1253 | (413) | 0.330 | 1787 | (467)  | 0.262 |

|            |      |        |       |      |       |       |      |       |       |      |       |       |
|------------|------|--------|-------|------|-------|-------|------|-------|-------|------|-------|-------|
| <b>4</b>   | 1643 | (90)   | 0.293 | 1032 | (13)  | 0.140 | 639  | (45)  | 0.558 | 999  | (108) | 0.335 |
| <b>6</b>   | 1275 | (133)  | 0.381 | 989  | (291) | 0.560 | 657  | (150) | 0.537 | 953  | (116) | 0.431 |
| <b>8</b>   | 1577 | (1198) | 0.331 | 1257 | (818) | 0.239 | 816  | (631) | 0.250 | 1248 | (914) | 0.295 |
| <b>9</b>   | 1487 | (844)  | 0.181 | 1274 | (618) | 0.241 | 923  | (545) | 0.312 | 1272 | (724) | 0.217 |
| <b>10L</b> | 1542 | (956)  | 0.003 | 1362 | (836) | 0.005 | 977  | (750) | 0.032 | 1330 | (871) | 0.007 |
| <b>10M</b> | 1555 | (982)  | 0.108 | 1481 | (904) | 0.165 | 1036 | (769) | 0.199 | 1357 | (885) | 0.111 |
| <b>11</b>  | 1666 | (1146) | 0.116 | 1496 | (915) | 0.156 | 1074 | (716) | 0.249 | 1452 | (975) | 0.142 |
| <b>44</b>  | 1833 | (240)  | 0.142 | 1513 | (61)  | 0.096 | 1099 | (30)  | 0.109 | 1302 | (91)  | 0.113 |
| <b>45</b>  | 1772 | (345)  | 0.194 | 1479 | (220) | 0.149 | 1058 | (163) | 0.154 | 1515 | (283) | 0.187 |
| <b>46</b>  | 1690 | (924)  | 0.547 | 1440 | (772) | 0.536 | 1012 | (548) | 0.541 | 1423 | (762) | 0.535 |
| <b>47</b>  | 1745 | (1088) | 0.624 | 1523 | (924) | 0.606 | 1132 | (736) | 0.650 | 1535 | (920) | 0.600 |

| Region     | GABA <sub>A</sub> /BZ |        |       |          |        |       |               |        |       |            |        |       |
|------------|-----------------------|--------|-------|----------|--------|-------|---------------|--------|-------|------------|--------|-------|
|            | supragranular         | (SD)   | CV    | granular | (SD)   | CV    | infragranular | (SD)   | CV    | all layers | (SD)   | CV    |
| <b>1</b>   | 3034                  | (1163) | 0.288 | 2296     | (1089) | 0.323 | 1710          | (800)  | 0.365 | 2507       | (1058) | 0.292 |
| <b>2</b>   | 3105                  | (1250) | 0.239 | 2758     | (1394) | 0.177 | 1951          | (963)  | 0.243 | 2685       | (1131) | 0.198 |
| <b>3a</b>  | 2953                  | (1294) | 0.438 | 2307     | (1187) | 0.514 | 1490          | (805)  | 0.540 | 2405       | (1095) | 0.455 |
| <b>3b</b>  | 3272                  | (1039) | 0.147 | 2801     | (1049) | 0.147 | 1757          | (575)  | 0.122 | 2826       | (888)  | 0.133 |
| <b>V1</b>  | 4006                  | (3477) | 0.868 | 3842     | (3219) | 0.838 | 1439          | (1066) | 0.741 | 3525       | (3035) | 0.562 |
| <b>V2d</b> | 4213                  | (3783) | 0.898 | 3477     | (2973) | 0.855 | 2099          | (1908) | 0.909 | 3234       | (2879) | 0.579 |
| <b>V2v</b> | 4164                  | (3435) | 0.825 | 3584     | (2882) | 0.804 | 2265          | (1746) | 0.771 | 3174       | (2349) | 0.526 |
| <b>V3A</b> | 3061                  | (2240) | 0.732 | 2381     | (1616) | 0.679 | 1636          | (1392) | 0.851 | 2446       | (1796) | 0.515 |
| <b>V3d</b> | 3098                  | (2325) | 0.750 | 2395     | (1535) | 0.641 | 1766          | (1265) | 0.716 | 2594       | (1894) | 0.479 |
| <b>V3v</b> | 3907                  | (3126) | 0.800 | 3162     | (2364) | 0.747 | 1840          | (1421) | 0.773 | 2917       | (2139) | 0.513 |
| <b>V4v</b> | 3204                  | (2070) | 0.646 | 2830     | (1997) | 0.706 | 1541          | (1347) | 0.874 | 2380       | (1774) | 0.526 |
| <b>FG1</b> | 2427                  | (488)  | 0.325 | 1962     | (538)  | 0.274 | 1379          | (192)  | 0.139 | 1938       | (512)  | 0.264 |
| <b>FG2</b> | 2745                  | (346)  | 0.126 | 2534     | (160)  | 0.063 | 1759          | (169)  | 0.096 | 2238       | (6)    | 0.003 |
| <b>37B</b> | 3282                  | (1748) | 0.533 | 3181     | (1867) | 0.587 | 2221          | (1107) | 0.499 | 2850       | (1510) | 0.530 |
| <b>37L</b> | 3640                  | (1182) | 0.325 | 3126     | (1266) | 0.405 | 2257          | (669)  | 0.297 | 3118       | (1025) | 0.329 |
| <b>37M</b> | 3639                  | (1247) | 0.199 | 3524     | (1257) | 0.066 | 2481          | (796)  | 0.153 | 3181       | (1089) | 0.167 |

|            |      |        |       |      |        |       |      |        |       |      |        |       |
|------------|------|--------|-------|------|--------|-------|------|--------|-------|------|--------|-------|
| <b>41</b>  | 3130 | (993)  | 0.130 | 2645 | (1114) | 0.122 | 1642 | (576)  | 0.201 | 2630 | (930)  | 0.125 |
| <b>42</b>  | 3206 | (1019) | 0.118 | 2552 | (654)  | 0.118 | 1763 | (346)  | 0.185 | 2674 | (816)  | 0.141 |
| <b>20</b>  | 2741 | (1438) | 0.301 | 2799 | (1408) | 0.229 | 2113 | (846)  | 0.277 | 2512 | (1187) | 0.269 |
| <b>21</b>  | 2837 | (1365) | 0.196 | 2759 | (1379) | 0.131 | 2080 | (846)  | 0.171 | 2552 | (1218) | 0.168 |
| <b>22</b>  | 2966 | (1222) | 0.248 | 2591 | (1185) | 0.215 | 1808 | (670)  | 0.184 | 2484 | (982)  | 0.231 |
| <b>36</b>  | 2514 | (1541) | 0.311 | 2555 | (1572) | 0.237 | 2013 | (1171) | 0.335 | 2322 | (1393) | 0.302 |
| <b>38</b>  | 2130 | (1442) | 0.129 | 2072 | (1249) | 0.149 | 1696 | (938)  | 0.048 | 1961 | (1233) | 0.100 |
| <b>5L</b>  | 3718 | (1185) | 0.319 | 3329 | (921)  | 0.277 | 2531 | (606)  | 0.239 | 3319 | (1020) | 0.307 |
| <b>5M</b>  | 3837 | (1015) | 0.264 | 3265 | (1232) | 0.377 | 2463 | (882)  | 0.358 | 3321 | (977)  | 0.294 |
| <b>PGa</b> | 3824 | (1177) | 0.398 | 3349 | (971)  | 0.328 | 2594 | (677)  | 0.351 | 3349 | (996)  | 0.376 |
| <b>PGp</b> | 3568 | (1272) | 0.256 | 3182 | (1149) | 0.148 | 2319 | (714)  | 0.198 | 3098 | (1079) | 0.249 |
| <b>PFt</b> | 3708 | (865)  | 0.221 | 3275 | (953)  | 0.187 | 2500 | (764)  | 0.272 | 3194 | (882)  | 0.254 |
| <b>PFm</b> | 3940 | (1750) | 0.591 | 3404 | (1716) | 0.463 | 2598 | (1125) | 0.498 | 3407 | (1481) | 0.557 |
| <b>24</b>  | 3040 | (1494) | 0.156 | --   | --     | --    | 2524 | (1150) | 0.120 | 2797 | (1322) | 0.152 |
| <b>32</b>  | 3078 | (1562) | 0.175 | 2902 | (1336) | 0.126 | 2257 | (903)  | 0.097 | 2767 | (1287) | 0.155 |
| <b>23</b>  | 3480 | (1137) | 0.218 | 3102 | (1249) | 0.257 | 2263 | (1036) | 0.290 | 3023 | (1092) | 0.239 |
| <b>31</b>  | 3246 | (1137) | 0.280 | 3154 | (1341) | 0.439 | 2547 | (1158) | 0.548 | 3004 | (1093) | 0.358 |
| <b>4</b>   | 2638 | (64)   | 0.242 | 1921 | (133)  | 0.352 | 1374 | (102)  | 0.338 | 1842 | (10)   | 0.234 |
| <b>6</b>   | 2187 | (177)  | 0.139 | 1925 | (419)  | 0.631 | 1462 | (235)  | 0.232 | 1811 | (181)  | 0.147 |
| <b>8</b>   | 2531 | (833)  | 0.055 | 2289 | (533)  | 0.037 | 1901 | (490)  | 0.037 | 2255 | (638)  | 0.039 |
| <b>9</b>   | 2808 | (1091) | 0.265 | 2668 | (728)  | 0.185 | 2254 | (534)  | 0.132 | 2577 | (825)  | 0.213 |
| <b>10L</b> | 2637 | (962)  | 0.062 | 2601 | (733)  | 0.092 | 2170 | (645)  | 0.082 | 2474 | (840)  | 0.073 |
| <b>10M</b> | 3107 | (752)  | 0.132 | 2975 | (677)  | 0.152 | 2383 | (557)  | 0.185 | 2820 | (658)  | 0.146 |
| <b>11</b>  | 3034 | (992)  | 0.014 | 3003 | (858)  | 0.015 | 2546 | (682)  | 0.046 | 2869 | (869)  | 0.005 |
| <b>44</b>  | 2254 | (118)  | 0.059 | 2003 | (64)   | 0.104 | 1651 | (66)   | 0.082 | 1797 | (105)  | 0.072 |
| <b>45</b>  | 2393 | (1780) | 0.028 | 1862 | (1089) | 0.082 | 1433 | (635)  | 0.062 | 2038 | (1372) | 0.058 |
| <b>46</b>  | 3089 | (1569) | 0.040 | 2735 | (1168) | 0.040 | 2274 | (905)  | 0.015 | 2774 | (1297) | 0.042 |
| <b>47</b>  | 2892 | (1313) | 0.068 | 2654 | (1091) | 0.005 | 2214 | (858)  | 0.009 | 2658 | (1130) | 0.041 |

**GABA<sub>B</sub>**



| Region | supragranular | (SD)   | CV    | granular | (SD)   | CV    | infragranular | (SD)   | CV    | all layers | (SD)   | CV    |
|--------|---------------|--------|-------|----------|--------|-------|---------------|--------|-------|------------|--------|-------|
| 1      | 2534          | (564)  | 0.095 | 1762     | (463)  | 0.212 | 1546          | (450)  | 0.239 | 2108       | (539)  | 0.138 |
| 2      | 2895          | (876)  | 0.303 | 2245     | (873)  | 0.389 | 1897          | (737)  | 0.388 | 2495       | (808)  | 0.324 |
| 3a     | 2549          | (676)  | 0.265 | 1761     | (482)  | 0.274 | 1345          | (367)  | 0.273 | 2075       | (580)  | 0.279 |
| 3b     | 2719          | (680)  | 0.250 | 1718     | (450)  | 0.262 | 1497          | (406)  | 0.271 | 2256       | (539)  | 0.239 |
| V1     | 2664          | (682)  | 0.256 | 1866     | (477)  | 0.256 | 1137          | (96)   | 0.085 | 2165       | (609)  | 0.159 |
| V2d    | 2543          | (824)  | 0.324 | 1869     | (592)  | 0.317 | 1328          | (499)  | 0.376 | 1964       | (649)  | 0.197 |
| V2v    | 2269          | (101)  | 0.000 | 1932     | (265)  | 0.137 | 1461          | (195)  | 0.133 | 1920       | (40)   | 0.071 |
| V3A    | 2108          | (159)  | 0.001 | 1509     | (73)   | 0.048 | 1151          | (21)   | 0.019 | 1692       | (26)   | 0.130 |
| V3d    | 2008          | (83)   | 0.041 | 1474     | (205)  | 0.139 | 982           | (165)  | 0.168 | 1617       | (119)  | 0.150 |
| V3v    | 2662          | (282)  | 0.106 | 2014     | (164)  | 0.081 | 1454          | (212)  | 0.146 | 2119       | (103)  | 0.049 |
| V4v    | 2125          | (393)  | 0.185 | 1988     | (313)  | 0.157 | 1304          | (293)  | 0.225 | 1715       | (371)  | 0.164 |
| FG1    | 2562          | (270)  | 0.105 | 1980     | (105)  | 0.053 | 1499          | (110)  | 0.073 | 2058       | (92)   | 0.045 |
| FG2    | 2960          | (54)   | 0.018 | 2325     | (275)  | 0.118 | 1857          | (343)  | 0.185 | 2371       | (237)  | 0.100 |
| 37B    | 2399          | (1079) | 0.450 | 2046     | (955)  | 0.467 | 1731          | (849)  | 0.491 | 2105       | (988)  | 0.470 |
| 37L    | 2713          | (1146) | 0.422 | 2120     | (824)  | 0.389 | 1858          | (744)  | 0.400 | 2354       | (993)  | 0.422 |
| 37M    | 2648          | (1077) | 0.208 | 2189     | (890)  | 0.230 | 1852          | (733)  | 0.223 | 2274       | (927)  | 0.228 |
| 41     | 2563          | (598)  | 0.234 | 1718     | (405)  | 0.236 | 1477          | (384)  | 0.260 | 2131       | (537)  | 0.252 |
| 42     | 2982          | (890)  | 0.298 | 2112     | (574)  | 0.272 | 1728          | (442)  | 0.256 | 2453       | (652)  | 0.266 |
| 20     | 2995          | (953)  | 0.228 | 2678     | (957)  | 0.272 | 2386          | (851)  | 0.274 | 2729       | (910)  | 0.246 |
| 21     | 3047          | (1043) | 0.317 | 2647     | (1052) | 0.312 | 2309          | (933)  | 0.298 | 2721       | (996)  | 0.325 |
| 22     | 2967          | (1104) | 0.359 | 2351     | (1011) | 0.466 | 1850          | (726)  | 0.421 | 2422       | (827)  | 0.325 |
| 36     | 3089          | (1265) | 0.326 | 2716     | (1080) | 0.401 | 2467          | (971)  | 0.411 | 2801       | (1121) | 0.358 |
| 38     | 1880          | (1432) | 0.081 | 1679     | (1193) | 0.091 | 1489          | (1024) | 0.142 | 1706       | (1244) | 0.101 |
| 5L     | 2881          | (664)  | 0.141 | 2356     | (636)  | 0.244 | 1952          | (517)  | 0.190 | 2527       | (577)  | 0.151 |
| 5M     | 2800          | (591)  | 0.211 | 2144     | (647)  | 0.302 | 2001          | (638)  | 0.319 | 2450       | (574)  | 0.234 |
| PGa    | 2168          | (784)  | 0.362 | 1712     | (669)  | 0.391 | 1489          | (580)  | 0.389 | 1889       | (712)  | 0.377 |
| PGp    | 2654          | (903)  | 0.201 | 2096     | (692)  | 0.166 | 1819          | (616)  | 0.187 | 2303       | (793)  | 0.199 |
| PFt    | 2582          | (1091) | 0.297 | 2080     | (853)  | 0.297 | 1800          | (794)  | 0.277 | 2222       | (948)  | 0.280 |
| PFm    | 2199          | (1053) | 0.406 | 1699     | (852)  | 0.388 | 1487          | (759)  | 0.408 | 1881       | (914)  | 0.417 |

|            |      |        |       |      |        |       |      |        |       |      |        |       |
|------------|------|--------|-------|------|--------|-------|------|--------|-------|------|--------|-------|
| <b>24</b>  | 3018 | (675)  | 0.224 | --   | --     | --    | 2340 | (695)  | 0.297 | 2702 | (684)  | 0.253 |
| <b>32</b>  | 2772 | (863)  | 0.024 | 2358 | (851)  | 0.016 | 2060 | (776)  | 0.007 | 2481 | (800)  | 0.017 |
| <b>23</b>  | 2293 | (628)  | 0.274 | 1764 | (525)  | 0.297 | 1560 | (524)  | 0.336 | 1988 | (569)  | 0.286 |
| <b>31</b>  | 2375 | (569)  | 0.240 | 1955 | (539)  | 0.275 | 1747 | (552)  | 0.316 | 2115 | (537)  | 0.254 |
| <b>4</b>   | 1901 | (6)    | 0.202 | 1219 | (132)  | 0.095 | 996  | (166)  | 0.237 | 1337 | (65)   | 0.196 |
| <b>6</b>   | 2004 | (71)   | 0.044 | 1596 | (83)   | 0.243 | 1379 | (32)   | 0.081 | 1675 | (40)   | 0.026 |
| <b>8</b>   | 2995 | (1575) | 0.094 | 2425 | (1146) | 0.096 | 2155 | (1040) | 0.069 | 2605 | (1283) | 0.089 |
| <b>9</b>   | 3224 | (1302) | 0.053 | 2691 | (1017) | 0.057 | 2428 | (953)  | 0.066 | 2869 | (1129) | 0.053 |
| <b>10L</b> | 2740 | (1020) | 0.011 | 2450 | (859)  | 0.007 | 2167 | (769)  | 0.015 | 2503 | (927)  | 0.001 |
| <b>10M</b> | 2808 | (1069) | 0.026 | 2521 | (974)  | 0.040 | 2224 | (836)  | 0.002 | 2552 | (956)  | 0.028 |
| <b>11</b>  | 3227 | (1502) | 0.032 | 2917 | (1372) | 0.009 | 2610 | (1246) | 0.020 | 2985 | (1394) | 0.007 |
| <b>44</b>  | 1862 | (87)   | 0.079 | 1494 | (5)    | 0.108 | 1353 | (44)   | 0.024 | 1487 | (64)   | 0.067 |
| <b>45</b>  | 1647 | (1391) | 0.017 | 1225 | (950)  | 0.010 | 1083 | (866)  | 0.011 | 1428 | (1197) | 0.032 |
| <b>46</b>  | 2878 | (617)  | 0.076 | 2396 | (582)  | 0.083 | 2154 | (528)  | 0.080 | 2584 | (593)  | 0.082 |
| <b>47</b>  | 2975 | (1004) | 0.004 | 2582 | (936)  | 0.056 | 2322 | (867)  | 0.081 | 2723 | (923)  | 0.027 |

| Region     | <b>M<sub>1</sub></b> |       |       |          |       |       |               |       |       |            |       |       |
|------------|----------------------|-------|-------|----------|-------|-------|---------------|-------|-------|------------|-------|-------|
|            | supragranular        | (SD)  | CV    | granular | (SD)  | CV    | infragranular | (SD)  | CV    | all layers | (SD)  | CV    |
| <b>1</b>   | 745                  | (270) | 0.517 | 493      | (121) | 0.498 | 387           | (50)  | 0.428 | 597        | (190) | 0.506 |
| <b>2</b>   | 815                  | (248) | 0.430 | 584      | (195) | 0.515 | 481           | (172) | 0.538 | 682        | (208) | 0.453 |
| <b>3a</b>  | 656                  | (130) | 0.349 | 435      | (41)  | 0.386 | 315           | (2)   | 0.314 | 535        | (112) | 0.390 |
| <b>3b</b>  | 771                  | (165) | 0.341 | 482      | (85)  | 0.320 | 372           | (61)  | 0.244 | 631        | (122) | 0.324 |
| <b>V1</b>  | 730                  | (127) | 0.174 | 562      | (15)  | 0.026 | 278           | (71)  | 0.256 | 594        | (60)  | 0.184 |
| <b>V2d</b> | 660                  | (88)  | 0.134 | 476      | (32)  | 0.067 | 294           | (100) | 0.340 | 487        | (93)  | 0.138 |
| <b>V2v</b> | 731                  | (122) | 0.166 | 693      | (105) | 0.151 | 412           | (33)  | 0.080 | 606        | (98)  | 0.152 |
| <b>V3A</b> | 460                  | (73)  | 0.160 | 352      | (79)  | 0.223 | 264           | (44)  | 0.167 | 377        | (72)  | 0.227 |
| <b>V3d</b> | 478                  | (69)  | 0.145 | 351      | (77)  | 0.218 | 223           | (101) | 0.454 | 381        | (81)  | 0.244 |
| <b>V3v</b> | 803                  | (181) | 0.225 | 617      | (110) | 0.178 | 313           | (52)  | 0.166 | 578        | (25)  | 0.196 |
| <b>V4v</b> | 766                  | (297) | 0.388 | 645      | (271) | 0.419 | 420           | (240) | 0.571 | 590        | (280) | 0.360 |
| <b>FG1</b> | 721                  | (480) | 0.874 | 600      | (314) | 0.774 | 420           | (139) | 0.689 | 580        | (320) | 0.809 |

|            |      |       |       |     |       |       |     |       |       |     |       |       |
|------------|------|-------|-------|-----|-------|-------|-----|-------|-------|-----|-------|-------|
| <b>FG2</b> | 739  | (511) | 0.894 | 567 | (262) | 0.726 | 427 | (176) | 0.764 | 564 | (311) | 0.815 |
| <b>37B</b> | 912  | (79)  | 0.251 | 746 | (46)  | 0.263 | 613 | (24)  | 0.206 | 775 | (31)  | 0.234 |
| <b>37L</b> | 1090 | (157) | 0.281 | 899 | (48)  | 0.220 | 772 | (195) | 0.192 | 952 | (98)  | 0.261 |
| <b>37M</b> | 783  | (297) | 0.571 | 613 | (152) | 0.493 | 528 | (122) | 0.515 | 655 | (214) | 0.555 |
| <b>41</b>  | 871  | (223) | 0.422 | 576 | (120) | 0.387 | 435 | (51)  | 0.273 | 699 | (163) | 0.428 |
| <b>42</b>  | 899  | (209) | 0.399 | 647 | (144) | 0.455 | 505 | (96)  | 0.488 | 749 | (158) | 0.412 |
| <b>20</b>  | 728  | (277) | 0.516 | 622 | (215) | 0.608 | 589 | (205) | 0.668 | 662 | (240) | 0.570 |
| <b>21</b>  | 927  | (168) | 0.319 | 805 | (125) | 0.352 | 710 | (102) | 0.395 | 826 | (130) | 0.341 |
| <b>22</b>  | 959  | (133) | 0.295 | 711 | (64)  | 0.302 | 566 | (35)  | 0.327 | 806 | (92)  | 0.300 |
| <b>36</b>  | 800  | (156) | 0.383 | 703 | (119) | 0.383 | 629 | (110) | 0.414 | 718 | (120) | 0.377 |
| <b>38</b>  | 852  | (47)  | 0.155 | 813 | (710) | 0.072 | 768 | (47)  | 0.100 | 814 | (64)  | 0.115 |
| <b>5L</b>  | 593  | (228) | 0.663 | 468 | (146) | 0.544 | 397 | (83)  | 0.584 | 514 | (167) | 0.622 |
| <b>5M</b>  | 646  | (146) | 0.457 | 455 | (87)  | 0.521 | 388 | (70)  | 0.567 | 541 | (119) | 0.497 |
| <b>PGa</b> | 738  | (136) | 0.190 | 608 | (87)  | 0.179 | 523 | (40)  | 0.137 | 649 | (95)  | 0.171 |
| <b>PGp</b> | 716  | (147) | 0.213 | 613 | (138) | 0.333 | 482 | (98)  | 0.398 | 621 | (118) | 0.262 |
| <b>PFt</b> | 914  | (131) | 0.175 | 728 | (105) | 0.199 | 596 | (49)  | 0.177 | 765 | (86)  | 0.190 |
| <b>PFm</b> | 854  | (111) | 0.305 | 677 | (41)  | 0.282 | 575 | (141) | 0.246 | 733 | (73)  | 0.303 |
| <b>24</b>  | 820  | (224) | 0.052 | --  | --    | --    | 680 | (293) | 0.015 | 755 | (153) | 0.060 |
| <b>32</b>  | 772  | (226) | 0.051 | 677 | (238) | 0.068 | 556 | (160) | 0.130 | 682 | (191) | 0.021 |
| <b>23</b>  | 731  | (203) | 0.260 | 541 | (88)  | 0.198 | 431 | (38)  | 0.208 | 619 | (146) | 0.255 |
| <b>31</b>  | 804  | (242) | 0.487 | 664 | (216) | 0.551 | 570 | (171) | 0.563 | 712 | (215) | 0.513 |
| <b>4</b>   | 358  | (34)  | 0.549 | 246 | (4)   | 0.056 | 183 | (3)   | 0.550 | 245 | (23)  | 0.555 |
| <b>6</b>   | 508  | (76)  | 0.271 | 385 | (44)  | 0.053 | 305 | (60)  | 0.240 | 400 | (74)  | 0.265 |
| <b>8</b>   | 685  | (211) | 0.042 | 585 | (174) | 0.066 | 519 | (137) | 0.015 | 609 | (170) | 0.020 |
| <b>9</b>   | 653  | (292) | 0.237 | 576 | (105) | 0.284 | 543 | (268) | 0.195 | 606 | (283) | 0.228 |
| <b>10L</b> | 600  | (250) | 0.025 | 568 | (231) | 0.086 | 483 | (223) | 0.153 | 556 | (240) | 0.061 |
| <b>10M</b> | 570  | (64)  | 0.189 | 548 | (69)  | 0.209 | 466 | (73)  | 0.293 | 531 | (66)  | 0.211 |
| <b>11</b>  | 606  | (102) | 0.172 | 617 | (66)  | 0.131 | 529 | (39)  | 0.190 | 581 | (76)  | 0.172 |
| <b>44</b>  | 679  | (76)  | 0.392 | 695 | (48)  | 0.359 | 635 | (22)  | 0.230 | 631 | (49)  | 0.309 |
| <b>45</b>  | 696  | (633) | 0.137 | 677 | (135) | 0.133 | 615 | (278) | 0.045 | 676 | (493) | 0.069 |

|               |                      |             |           |                 |             |           |                      |             |           |                   |             |           |
|---------------|----------------------|-------------|-----------|-----------------|-------------|-----------|----------------------|-------------|-----------|-------------------|-------------|-----------|
| 46            | 749                  | (397)       | 0.261     | 672             | (174)       | 0.239     | 583                  | (194)       | 0.188     | 684               | (362)       | 0.236     |
| 47            | 761                  | (405)       | 0.124     | 730             | (41)        | 0.127     | 653                  | (370)       | 0.135     | 725               | (388)       | 0.130     |
|               |                      |             |           |                 |             |           | <b>M<sub>2</sub></b> |             |           |                   |             |           |
| <b>Region</b> | <b>supragranular</b> | <b>(SD)</b> | <b>CV</b> | <b>granular</b> | <b>(SD)</b> | <b>CV</b> | <b>infragranular</b> | <b>(SD)</b> | <b>CV</b> | <b>all layers</b> | <b>(SD)</b> | <b>CV</b> |
| 1             | 222                  | (34)        | 0.154     | 204             | (47)        | 0.230     | 153                  | (26)        | 0.172     | 199               | (32)        | 0.161     |
| 2             | 171                  | (48)        | 0.281     | 179             | (56)        | 0.311     | 164                  | (53)        | 0.324     | 171               | (48)        | 0.282     |
| 3a            | 191                  | (47)        | 0.246     | 187             | (48)        | 0.258     | 165                  | (57)        | 0.346     | 183               | (50)        | 0.274     |
| 3b            | 313                  | (70)        | 0.224     | 291             | (58)        | 0.201     | 207                  | (52)        | 0.250     | 282               | (58)        | 0.207     |
| V1            | 483                  | (65)        | 0.137     | 535             | (92)        | 0.172     | 311                  | (104)       | 0.334     | 462               | (80)        | 0.140     |
| V2d           | 477                  | (243)       | 0.503     | 443             | (213)       | 0.479     | 282                  | (82)        | 0.290     | 392               | (168)       | 0.322     |
| V2v           | 389                  | (64)        | 0.165     | 399             | (119)       | 0.298     | 292                  | (42)        | 0.144     | 347               | (41)        | 0.206     |
| V3A           | 193                  | (1)         | 0.006     | 204             | (14)        | 0.068     | 190                  | (27)        | 0.141     | 193               | (11)        | 0.095     |
| V3d           | 233                  | (15)        | 0.066     | 243             | (7)         | 0.030     | 215                  | (31)        | 0.143     | 229               | (19)        | 0.120     |
| V3v           | 320                  | (79)        | 0.248     | 356             | (113)       | 0.318     | 261                  | (61)        | 0.233     | 299               | (68)        | 0.256     |
| V4v           | 285                  | (55)        | 0.191     | 302             | (43)        | 0.144     | 185                  | (90)        | 0.485     | 236               | (76)        | 0.231     |
| FG1           | 210                  | (32)        | 0.155     | 246             | (51)        | 0.206     | 191                  | (2)         | 0.011     | 204               | (21)        | 0.103     |
| FG2           | 188                  | (15)        | 0.079     | 208             | (33)        | 0.160     | 195                  | (36)        | 0.183     | 192               | (27)        | 0.138     |
| 37B           | 135                  | (58)        | 0.429     | 154             | (60)        | 0.393     | 146                  | (51)        | 0.351     | 141               | (54)        | 0.386     |
| 37L           | 157                  | (61)        | 0.389     | 186             | (66)        | 0.356     | 175                  | (58)        | 0.331     | 169               | (57)        | 0.337     |
| 37M           | 162                  | (67)        | 0.338     | 179             | (59)        | 0.217     | 166                  | (56)        | 0.180     | 167               | (62)        | 0.261     |
| 41            | 313                  | (89)        | 0.286     | 320             | (125)       | 0.391     | 184                  | (69)        | 0.375     | 277               | (84)        | 0.304     |
| 42            | 193                  | (55)        | 0.284     | 218             | (66)        | 0.301     | 158                  | (58)        | 0.366     | 187               | (54)        | 0.290     |
| 20            | 133                  | (66)        | 0.495     | 166             | (70)        | 0.422     | 167                  | (85)        | 0.513     | 146               | (67)        | 0.459     |
| 21            | 140                  | (42)        | 0.300     | 183             | (48)        | 0.262     | 174                  | (49)        | 0.284     | 157               | (45)        | 0.285     |
| 22            | 187                  | (43)        | 0.229     | 191             | (56)        | 0.293     | 140                  | (71)        | 0.505     | 171               | (49)        | 0.285     |
| 36            | 121                  | (52)        | 0.431     | 120             | (41)        | 0.339     | 137                  | (53)        | 0.385     | 127               | (51)        | 0.403     |
| 38            | 187                  | (150)       | 0.804     | 195             | (141)       | 0.720     | 216                  | (123)       | 0.571     | 199               | (139)       | 0.699     |
| 5L            | 169                  | (47)        | 0.276     | 185             | (53)        | 0.286     | 178                  | (48)        | 0.269     | 174               | (46)        | 0.266     |
| 5M            | 199                  | (49)        | 0.246     | 209             | (55)        | 0.262     | 186                  | (41)        | 0.222     | 197               | (46)        | 0.232     |

|            |     |       |       |     |       |       |     |       |       |     |       |       |
|------------|-----|-------|-------|-----|-------|-------|-----|-------|-------|-----|-------|-------|
| <b>PGa</b> | 219 | (47)  | 0.214 | 259 | (41)  | 0.158 | 225 | (42)  | 0.185 | 227 | (34)  | 0.151 |
| <b>PGp</b> | 229 | (72)  | 0.314 | 256 | (58)  | 0.225 | 205 | (55)  | 0.266 | 226 | (59)  | 0.263 |
| <b>PFt</b> | 168 | (43)  | 0.255 | 199 | (39)  | 0.196 | 180 | (32)  | 0.179 | 177 | (35)  | 0.197 |
| <b>PFm</b> | 187 | (40)  | 0.213 | 208 | (35)  | 0.170 | 179 | (40)  | 0.222 | 187 | (36)  | 0.192 |
| <b>24</b>  | 205 | (119) | 0.583 | --  | --    | --    | 237 | (119) | 0.503 | 219 | (118) | 0.538 |
| <b>32</b>  | 210 | (146) | 0.696 | 236 | (139) | 0.588 | 209 | (107) | 0.512 | 211 | (130) | 0.613 |
| <b>23</b>  | 208 | (51)  | 0.247 | 219 | (45)  | 0.207 | 163 | (42)  | 0.258 | 196 | (45)  | 0.231 |
| <b>31</b>  | 201 | (62)  | 0.308 | 241 | (72)  | 0.300 | 215 | (61)  | 0.283 | 210 | (61)  | 0.289 |
| <b>4</b>   | 156 | (19)  | 0.265 | 138 | (28)  | 0.045 | 128 | (33)  | 0.377 | 141 | (27)  | 0.264 |
| <b>6</b>   | 150 | (54)  | 0.407 | 157 | (45)  | 0.538 | 139 | (32)  | 0.575 | 145 | (44)  | 0.455 |
| <b>8</b>   | 200 | (147) | 0.135 | 224 | (134) | 0.183 | 207 | (129) | 0.097 | 204 | (138) | 0.121 |
| <b>9</b>   | 198 | (143) | 0.202 | 233 | (152) | 0.140 | 185 | (68)  | 0.068 | 199 | (120) | 0.146 |
| <b>10L</b> | 167 | (111) | 0.188 | 210 | (121) | 0.141 | 199 | (118) | 0.122 | 183 | (114) | 0.154 |
| <b>10M</b> | 176 | (140) | 0.214 | 217 | (156) | 0.176 | 217 | (147) | 0.094 | 195 | (144) | 0.148 |
| <b>11</b>  | 152 | (120) | 0.332 | 197 | (148) | 0.216 | 200 | (125) | 0.207 | 173 | (125) | 0.271 |
| <b>44</b>  | 253 | (43)  | 0.004 | 281 | (25)  | 0.142 | 253 | (13)  | 0.198 | 247 | (20)  | 0.091 |
| <b>45</b>  | 211 | (171) | 0.204 | 241 | (157) | 0.197 | 214 | (147) | 0.278 | 215 | (162) | 0.222 |
| <b>46</b>  | 236 | (172) | 0.146 | 275 | (191) | 0.162 | 258 | (160) | 0.152 | 248 | (169) | 0.148 |
| <b>47</b>  | 184 | (120) | 0.165 | 220 | (131) | 0.098 | 215 | (108) | 0.157 | 198 | (119) | 0.150 |

| Region     | <b>M<sub>3</sub></b> |       |       |          |       |       |               |       |       |            |       |       |
|------------|----------------------|-------|-------|----------|-------|-------|---------------|-------|-------|------------|-------|-------|
|            | supragranular        | (SD)  | CV    | granular | (SD)  | CV    | infragranular | (SD)  | CV    | all layers | (SD)  | CV    |
| <b>1</b>   | 632                  | (164) | 0.259 | 456      | (87)  | 0.192 | 404           | (85)  | 0.210 | 537        | (119) | 0.222 |
| <b>2</b>   | 671                  | (275) | 0.410 | 545      | (213) | 0.392 | 468           | (194) | 0.415 | 597        | (247) | 0.414 |
| <b>3a</b>  | 598                  | (246) | 0.412 | 474      | (189) | 0.398 | 384           | (136) | 0.355 | 526        | (217) | 0.413 |
| <b>3b</b>  | 655                  | (251) | 0.384 | 479      | (173) | 0.362 | 375           | (171) | 0.456 | 565        | (245) | 0.434 |
| <b>V1</b>  | 639                  | (39)  | 0.051 | 498      | (21)  | 0.009 | 387           | (29)  | 0.040 | 540        | (53)  | 0.018 |
| <b>V2d</b> | 566                  | (43)  | 0.136 | 415      | (43)  | 0.135 | 249           | (58)  | 0.123 | 421        | (40)  | 0.104 |
| <b>V2v</b> | 560                  | (54)  | 0.025 | 449      | (39)  | 0.003 | 310           | (39)  | 0.041 | 478        | (38)  | 0.023 |
| <b>V3A</b> | 437                  | (38)  | 0.084 | 395      | (15)  | 0.098 | 284           | (46)  | 0.093 | 382        | (20)  | 0.083 |

|            |      |       |       |      |       |       |      |       |       |      |       |       |
|------------|------|-------|-------|------|-------|-------|------|-------|-------|------|-------|-------|
| <b>V3d</b> | 467  | (29)  | 0.016 | 389  | (32)  | 0.019 | 285  | (21)  | 0.013 | 401  | (37)  | 0.049 |
| <b>V3v</b> | 569  | (52)  | 0.013 | 482  | (17)  | 0.025 | 329  | (15)  | 0.013 | 485  | (53)  | 0.061 |
| <b>V4v</b> | 435  | (91)  | 0.082 | 417  | (72)  | 0.011 | 295  | (13)  | 0.032 | 361  | (24)  | 0.120 |
| <b>FG1</b> | 651  | (53)  | 0.296 | 543  | (81)  | 0.323 | 457  | (30)  | 0.236 | 561  | (105) | 0.206 |
| <b>FG2</b> | 675  | (80)  | 0.035 | 591  | (90)  | 0.014 | 459  | (63)  | 0.016 | 575  | (84)  | 0.026 |
| <b>37B</b> | 681  | (119) | 0.175 | 562  | (111) | 0.197 | 460  | (118) | 0.257 | 585  | (114) | 0.195 |
| <b>37L</b> | 1147 | (732) | 0.639 | 989  | (582) | 0.588 | 836  | (533) | 0.637 | 1014 | (651) | 0.642 |
| <b>37M</b> | 1134 | (718) | 0.633 | 960  | (548) | 0.571 | 791  | (428) | 0.541 | 963  | (563) | 0.584 |
| <b>41</b>  | 681  | (340) | 0.499 | 465  | (235) | 0.506 | 371  | (144) | 0.388 | 568  | (266) | 0.469 |
| <b>42</b>  | 688  | (295) | 0.429 | 532  | (238) | 0.448 | 415  | (219) | 0.528 | 579  | (261) | 0.451 |
| <b>20</b>  | 672  | (463) | 0.581 | 604  | (393) | 0.534 | 538  | (359) | 0.501 | 610  | (418) | 0.541 |
| <b>21</b>  | 722  | (316) | 0.246 | 625  | (259) | 0.197 | 547  | (220) | 0.215 | 649  | (272) | 0.237 |
| <b>22</b>  | 787  | (250) | 0.110 | 622  | (152) | 0.031 | 497  | (116) | 0.137 | 644  | (200) | 0.126 |
| <b>36</b>  | 683  | (480) | 0.570 | 593  | (392) | 0.547 | 517  | (370) | 0.489 | 604  | (414) | 0.545 |
| <b>38</b>  | 569  | (70)  | 0.123 | 530  | (60)  | 0.113 | 484  | (14)  | 0.030 | 534  | (48)  | 0.089 |
| <b>5L</b>  | 1127 | (421) | 0.374 | 925  | (406) | 0.438 | 764  | (315) | 0.413 | 989  | (406) | 0.410 |
| <b>5M</b>  | 1116 | (329) | 0.295 | 915  | (345) | 0.377 | 802  | (271) | 0.338 | 1004 | (312) | 0.311 |
| <b>PGa</b> | 1232 | (340) | 0.276 | 1052 | (334) | 0.317 | 919  | (297) | 0.324 | 1102 | (321) | 0.292 |
| <b>PGp</b> | 1738 | (161) | 0.017 | 1502 | (95)  | 0.016 | 1226 | (110) | 0.012 | 1500 | (121) | 0.016 |
| <b>PFt</b> | 852  | (166) | 0.109 | 718  | (166) | 0.260 | 616  | (157) | 0.201 | 746  | (164) | 0.141 |
| <b>PFm</b> | 847  | (131) | 0.154 | 632  | (136) | 0.215 | 556  | (151) | 0.271 | 720  | (139) | 0.193 |
| <b>24</b>  | 594  | (5)   | 0.009 | --   | --    | --    | 483  | (9)   | 0.019 | 544  | (1)   | 0.002 |
| <b>32</b>  | 577  | (4)   | 0.007 | 525  | (36)  | 0.069 | 477  | (43)  | 0.091 | 538  | (19)  | 0.036 |
| <b>23</b>  | 735  | (289) | 0.393 | 559  | (206) | 0.368 | 478  | (200) | 0.418 | 643  | (258) | 0.402 |
| <b>31</b>  | 829  | (280) | 0.338 | 728  | (272) | 0.374 | 670  | (218) | 0.325 | 762  | (257) | 0.337 |
| <b>4</b>   | 491  | (85)  | 0.321 | 321  | (61)  | 0.049 | 278  | (68)  | 0.388 | 400  | (44)  | 0.359 |
| <b>6</b>   | 478  | (13)  | 0.020 | 419  | (32)  | 0.254 | 354  | (21)  | 0.153 | 412  | (7)   | 0.036 |
| <b>8</b>   | 629  | (21)  | 0.033 | 584  | (24)  | 0.042 | 516  | (10)  | 0.020 | 583  | (20)  | 0.035 |
| <b>9</b>   | 754  | (12)  | 0.016 | 673  | (16)  | 0.024 | 604  | (18)  | 0.030 | 691  | (19)  | 0.027 |
| <b>10L</b> | 862  | (352) | 0.004 | 789  | (270) | 0.025 | 669  | (226) | 0.004 | 788  | (301) | 0.005 |

|            |     |       |       |     |       |       |     |       |       |     |       |       |
|------------|-----|-------|-------|-----|-------|-------|-----|-------|-------|-----|-------|-------|
| <b>10M</b> | 810 | (283) | 0.018 | 812 | (280) | 0.056 | 728 | (251) | 0.082 | 779 | (266) | 0.022 |
| <b>11</b>  | 924 | (434) | 0.071 | 911 | (361) | 0.058 | 789 | (281) | 0.034 | 879 | (376) | 0.059 |
| <b>44</b>  | 476 | (57)  | 0.183 | 417 | (24)  | 0.169 | 363 | (15)  | 0.233 | 432 | (32)  | 0.195 |
| <b>45</b>  | 458 | (30)  | 0.066 | 404 | (11)  | 0.026 | 366 | (9)   | 0.025 | 420 | (20)  | 0.046 |
| <b>46</b>  | 710 | (7)   | 0.011 | 640 | (16)  | 0.024 | 579 | (13)  | 0.022 | 656 | (9)   | 0.013 |
| <b>47</b>  | 662 | (94)  | 0.142 | 644 | (104) | 0.162 | 583 | (67)  | 0.115 | 640 | (89)  | 0.138 |

| Region     | $\alpha_4\beta_2$ |      |       |          |      |       |               |      |       |            |      |       |
|------------|-------------------|------|-------|----------|------|-------|---------------|------|-------|------------|------|-------|
|            | supragranular     | (SD) | CV    | granular | (SD) | CV    | infragranular | (SD) | CV    | all layers | (SD) | CV    |
| <b>1</b>   | 33                | (5)  | 0.157 | 26       | (3)  | 0.098 | 24            | (3)  | 0.125 | 29         | (4)  | 0.123 |
| <b>2</b>   | 30                | (8)  | 0.268 | 28       | (8)  | 0.268 | 25            | (1)  | 0.010 | 28         | (6)  | 0.207 |
| <b>3a</b>  | 58                | (25) | 0.431 | 73       | (25) | 0.345 | 46            | (21) | 0.448 | 56         | (22) | 0.389 |
| <b>3b</b>  | 46                | (8)  | 0.184 | 104      | (16) | 0.157 | 44            | (6)  | 0.132 | 54         | (8)  | 0.152 |
| <b>V1</b>  | 36                | (6)  | 0.023 | 53       | (4)  | 0.128 | 28            | (2)  | 0.007 | 39         | (3)  | 0.123 |
| <b>V2d</b> | 39                | (7)  | 0.002 | 28       | (8)  | 0.019 | 36            | (4)  | 0.004 | 37         | (5)  | 0.022 |
| <b>V2v</b> | 39                | (6)  | 0.024 | 41       | (3)  | 0.047 | 39            | (1)  | 0.024 | 39         | (7)  | 0.087 |
| <b>V3A</b> | 45                | (11) | 0.172 | 39       | (9)  | 0.130 | 41            | (3)  | 0.089 | 43         | (16) | 0.091 |
| <b>V3d</b> | 33                | (6)  | 0.024 | 40       | (2)  | 0.017 | 27            | (9)  | 0.071 | 32         | (7)  | 0.014 |
| <b>V3v</b> | 44                | (2)  | 0.028 | 48       | (6)  | 0.026 | 50            | (12) | 0.054 | 47         | (7)  | 0.020 |
| <b>V4v</b> | 38                | (3)  | 0.061 | 40       | (7)  | 0.091 | 35            | (2)  | 0.049 | 37         | (7)  | 0.081 |
| <b>FG1</b> | 53                | (8)  | 0.143 | 55       | (7)  | 0.124 | 55            | (7)  | 0.124 | 54         | (7)  | 0.133 |
| <b>FG2</b> | 59                | (1)  | 0.016 | 46       | (16) | 0.345 | 49            | (4)  | 0.079 | 53         | (4)  | 0.076 |
| <b>37B</b> | 40                | (17) | 0.415 | 42       | (19) | 0.443 | 41            | (21) | 0.511 | 41         | (18) | 0.448 |
| <b>37L</b> | 37                | (13) | 0.360 | 36       | (9)  | 0.252 | 36            | (10) | 0.268 | 36         | (11) | 0.312 |
| <b>37M</b> | 35                | (14) | 0.409 | 35       | (13) | 0.367 | 34            | (14) | 0.412 | 34         | (14) | 0.402 |
| <b>41</b>  | 49                | (33) | 0.676 | 86       | (44) | 0.515 | 48            | (29) | 0.597 | 54         | (32) | 0.593 |
| <b>42</b>  | 38                | (29) | 0.650 | 38       | (31) | 0.711 | 37            | (33) | 0.788 | 38         | (30) | 0.688 |
| <b>20</b>  | 28                | (26) | 0.006 | 35       | (43) | 0.001 | 31            | (37) | 0.043 | 31         | (33) | 0.008 |
| <b>21</b>  | 34                | (13) | 0.684 | 35       | (32) | 0.726 | 33            | (31) | 0.752 | 34         | (30) | 0.711 |
| <b>22</b>  | 31                | (25) | 0.791 | 29       | (24) | 0.836 | 30            | (27) | 0.901 | 30         | (25) | 0.831 |

|               |                      |             |           |                 |             |            |                      |             |           |                   |             |           |
|---------------|----------------------|-------------|-----------|-----------------|-------------|------------|----------------------|-------------|-----------|-------------------|-------------|-----------|
| <b>36</b>     | 34                   | (16)        | 0.470     | 36              | (14)        | 0.400      | 34                   | (19)        | 0.557     | 34                | (17)        | 0.506     |
| <b>38</b>     | 39                   | (5)         | 0.116     | 40              | (3)         | 0.124      | 38                   | (3)         | 0.193     | 39                | (4)         | 0.101     |
| <b>5L</b>     | 39                   | (28)        | 0.708     | 39              | (30)        | 0.763      | 37                   | (26)        | 0.706     | 39                | (28)        | 0.715     |
| <b>5M</b>     | 41                   | (25)        | 0.615     | 40              | (26)        | 0.647      | 42                   | (29)        | 0.698     | 41                | (27)        | 0.647     |
| <b>PGa</b>    | 40                   | (18)        | 0.457     | 42              | (21)        | 0.488      | 46                   | (23)        | 0.496     | 43                | (20)        | 0.473     |
| <b>PGp</b>    | 46                   | (21)        | 0.470     | 49              | (22)        | 0.451      | 51                   | (26)        | 0.505     | 48                | (23)        | 0.479     |
| <b>PFt</b>    | 27                   | (18)        | 0.641     | 30              | (21)        | 0.687      | 30                   | (20)        | 0.690     | 28                | (19)        | 0.664     |
| <b>PFm</b>    | 33                   | (15)        | 0.459     | 32              | (15)        | 0.461      | 35                   | (17)        | 0.491     | 33                | (16)        | 0.470     |
| <b>24</b>     | 75                   | (38)        | 0.802     | --              | --          | --         | 73                   | (17)        | 0.787     | 74                | (59)        | 0.795     |
| <b>32</b>     | 138                  | (60)        | 0.019     | 131             | (57)        | 0.091      | 106                  | (45)        | 0.063     | 124               | (53)        | 0.011     |
| <b>23</b>     | 59                   | (22)        | 0.377     | 65              | (27)        | 0.410      | 51                   | (23)        | 0.444     | 58                | (22)        | 0.380     |
| <b>31</b>     | 44                   | (17)        | 0.378     | 49              | (20)        | 0.412      | 46                   | (17)        | 0.377     | 45                | (17)        | 0.383     |
| <b>4</b>      | 85                   | (19)        | 0.141     | 78              | (12)        | 0.250      | 62                   | (8)         | 0.212     | 69                | (13)        | 0.139     |
| <b>6</b>      | 37                   | (12)        | 0.053     | 42              | (23)        | 0.408      | 31                   | (18)        | 0.023     | 34                | (15)        | 0.049     |
| <b>8</b>      | 120                  | (53)        | 0.432     | 108             | (33)        | 0.801      | 94                   | (11)        | 0.540     | 109               | (51)        | 0.372     |
| <b>9</b>      | 71                   | (5)         | 0.068     | 76              | (58)        | 0.373      | 68                   | (15)        | 0.285     | 71                | (11)        | 0.179     |
| <b>10L</b>    | 60                   | (45)        | 0.084     | 67              | (41)        | 0.018      | 71                   | (15)        | 0.102     | 65                | (44)        | 0.019     |
| <b>10M</b>    | 62                   | (54)        | 0.222     | 69              | (51)        | 0.139      | 76                   | (56)        | 0.141     | 68                | (54)        | 0.172     |
| <b>11</b>     | 59                   | (37)        | 0.010     | 63              | (39)        | 0.023      | 61                   | (42)        | 0.273     | 60                | (39)        | 0.083     |
| <b>44</b>     | 51                   | (16)        | 0.426     | 51              | (15)        | 0.418      | 49                   | (12)        | 0.501     | 47                | (13)        | 0.451     |
| <b>45</b>     | 48                   | (5)         | 0.675     | 50              | (6)         | 0.787      | 44                   | (44)        | 0.525     | 47                | (49)        | 0.633     |
| <b>46</b>     | 109                  | (30)        | 0.249     | 109             | (42)        | 0.236      | 110                  | (46)        | 0.125     | 109               | (51)        | 0.202     |
| <b>47</b>     | 87                   | (31)        | 0.103     | 85              | (10)        | 0.034      | 95                   | (15)        | 0.017     | 89                | (15)        | 0.124     |
|               |                      |             |           |                 |             | $\alpha_1$ |                      |             |           |                   |             |           |
| <b>Region</b> | <b>supragranular</b> | <b>(SD)</b> | <b>CV</b> | <b>granular</b> | <b>(SD)</b> | <b>CV</b>  | <b>infragranular</b> | <b>(SD)</b> | <b>CV</b> | <b>all layers</b> | <b>(SD)</b> | <b>CV</b> |
| <b>1</b>      | 316                  | (149)       | 0.471     | 185             | (99)        | 0.534      | 225                  | (116)       | 0.518     | 272               | (136)       | 0.499     |
| <b>2</b>      | 367                  | (174)       | 0.070     | 244             | (145)       | 0.129      | 289                  | (189)       | 0.158     | 328               | (175)       | 0.095     |
| <b>3a</b>     | 349                  | (184)       | 0.251     | 225             | (125)       | 0.242      | 216                  | (127)       | 0.294     | 292               | (162)       | 0.251     |
| <b>3b</b>     | 290                  | (142)       | 0.232     | 172             | (100)       | 0.237      | 176                  | (92)        | 0.290     | 244               | (117)       | 0.232     |



|            |     |       |       |     |       |       |     |       |       |     |       |       |
|------------|-----|-------|-------|-----|-------|-------|-----|-------|-------|-----|-------|-------|
| <b>V1</b>  | 305 | (38)  | 0.126 | 230 | (41)  | 0.180 | 191 | (27)  | 0.141 | 262 | (45)  | 0.178 |
| <b>V2d</b> | 412 | (124) | 0.302 | 238 | (92)  | 0.386 | 237 | (108) | 0.454 | 322 | (113) | 0.251 |
| <b>V2v</b> | 394 | (69)  | 0.175 | 246 | (35)  | 0.143 | 253 | (58)  | 0.228 | 323 | (39)  | 0.196 |
| <b>V3A</b> | 313 | (4)   | 0.013 | 219 | (3)   | 0.013 | 259 | (10)  | 0.039 | 284 | (6)   | 0.134 |
| <b>V3d</b> | 324 | (21)  | 0.065 | 201 | (26)  | 0.128 | 217 | (59)  | 0.273 | 277 | (36)  | 0.140 |
| <b>V3v</b> | 346 | (6)   | 0.017 | 210 | (32)  | 0.152 | 248 | (101) | 0.407 | 301 | (28)  | 0.166 |
| <b>V4v</b> | 290 | (100) | 0.346 | 239 | (87)  | 0.363 | 248 | (98)  | 0.397 | 266 | (99)  | 0.254 |
| <b>FG1</b> | 297 | (71)  | 0.239 | 224 | (24)  | 0.109 | 289 | (27)  | 0.092 | 287 | (47)  | 0.164 |
| <b>FG2</b> | 262 | (119) | 0.454 | 144 | (77)  | 0.531 | 193 | (109) | 0.568 | 219 | (107) | 0.484 |
| <b>37B</b> | 310 | (80)  | 0.259 | 233 | (49)  | 0.211 | 296 | (93)  | 0.315 | 297 | (82)  | 0.275 |
| <b>37L</b> | 327 | (67)  | 0.204 | 232 | (75)  | 0.324 | 304 | (98)  | 0.321 | 307 | (76)  | 0.247 |
| <b>37M</b> | 338 | (103) | 0.303 | 237 | (92)  | 0.386 | 305 | (95)  | 0.311 | 312 | (99)  | 0.316 |
| <b>41</b>  | 257 | (145) | 0.370 | 157 | (109) | 0.407 | 182 | (115) | 0.374 | 223 | (132) | 0.378 |
| <b>42</b>  | 332 | (163) | 0.491 | 211 | (137) | 0.651 | 235 | (153) | 0.650 | 289 | (156) | 0.540 |
| <b>20</b>  | 654 | (753) | 0.526 | 532 | (622) | 0.699 | 684 | (783) | 0.682 | 648 | (746) | 0.604 |
| <b>21</b>  | 655 | (781) | 0.536 | 534 | (639) | 0.591 | 702 | (831) | 0.632 | 656 | (775) | 0.581 |
| <b>22</b>  | 658 | (773) | 0.545 | 478 | (637) | 0.712 | 575 | (733) | 0.712 | 608 | (741) | 0.611 |
| <b>36</b>  | 707 | (862) | 0.447 | 606 | (751) | 0.645 | 724 | (824) | 0.533 | 701 | (836) | 0.494 |
| <b>38</b>  | 324 | (124) | 0.219 | 277 | (84)  | 0.194 | 320 | (128) | 0.153 | 317 | (121) | 0.193 |
| <b>5L</b>  | 348 | (170) | 0.209 | 240 | (147) | 0.348 | 257 | (150) | 0.289 | 309 | (160) | 0.242 |
| <b>5M</b>  | 368 | (185) | 0.501 | 235 | (130) | 0.554 | 272 | (172) | 0.633 | 317 | (172) | 0.545 |
| <b>PGa</b> | 327 | (163) | 0.223 | 219 | (121) | 0.412 | 282 | (156) | 0.363 | 299 | (157) | 0.286 |
| <b>PGp</b> | 331 | (153) | 0.092 | 230 | (116) | 0.160 | 280 | (150) | 0.154 | 303 | (149) | 0.109 |
| <b>PFt</b> | 306 | (103) | 0.337 | 220 | (67)  | 0.305 | 275 | (109) | 0.397 | 284 | (99)  | 0.347 |
| <b>PFm</b> | 353 | (114) | 0.211 | 222 | (84)  | 0.232 | 304 | (109) | 0.238 | 321 | (106) | 0.211 |
| <b>24</b>  | 547 | (275) | 0.012 | --  | --    | --    | 506 | (228) | 0.042 | 526 | (250) | 0.028 |
| <b>32</b>  | 433 | (254) | 0.047 | 349 | (196) | 0.067 | 357 | (193) | 0.089 | 395 | (223) | 0.069 |
| <b>23</b>  | 318 | (129) | 0.234 | 204 | (72)  | 0.160 | 234 | (75)  | 0.213 | 277 | (104) | 0.216 |
| <b>31</b>  | 431 | (162) | 0.324 | 313 | (134) | 0.367 | 322 | (143) | 0.288 | 379 | (149) | 0.307 |
| <b>4</b>   | 263 | (13)  | 0.424 | 179 | (0)   | 0.187 | 155 | (3)   | 0.595 | 193 | (7)   | 0.478 |

|            |      |       |       |      |       |       |      |       |       |      |       |       |
|------------|------|-------|-------|------|-------|-------|------|-------|-------|------|-------|-------|
| <b>6</b>   | 2287 | (209) | 0.467 | 1750 | (383) | 0.592 | 1563 | (264) | 0.422 | 1880 | (232) | 0.443 |
| <b>8</b>   | 361  | (169) | 0.097 | 271  | (121) | 0.183 | 298  | (141) | 0.156 | 326  | (148) | 0.137 |
| <b>9</b>   | 319  | (219) | 0.073 | 255  | (176) | 0.099 | 289  | (201) | 0.131 | 300  | (205) | 0.096 |
| <b>10L</b> | 341  | (226) | 0.077 | 252  | (136) | 0.033 | 255  | (142) | 0.028 | 302  | (188) | 0.058 |
| <b>10M</b> | 336  | (199) | 0.045 | 259  | (128) | 0.011 | 269  | (144) | 0.014 | 304  | (172) | 0.030 |
| <b>11</b>  | 385  | (279) | 0.053 | 308  | (230) | 0.067 | 302  | (224) | 0.009 | 349  | (253) | 0.041 |
| <b>44</b>  | 208  | (20)  | 0.447 | 140  | (20)  | 0.401 | 158  | (7)   | 0.527 | 126  | (9)   | 0.466 |
| <b>45</b>  | 239  | (174) | 0.344 | 144  | (95)  | 0.337 | 146  | (96)  | 0.278 | 200  | (143) | 0.347 |
| <b>46</b>  | 347  | (175) | 0.076 | 242  | (97)  | 0.009 | 268  | (109) | 0.007 | 308  | (145) | 0.049 |
| <b>47</b>  | 337  | (143) | 0.087 | 249  | (88)  | 0.100 | 281  | (116) | 0.125 | 308  | (124) | 0.095 |

| Region     | $\alpha_2$    |       |       |          |       |       |               |       |       |            |       |       |
|------------|---------------|-------|-------|----------|-------|-------|---------------|-------|-------|------------|-------|-------|
|            | supragranular | (SD)  | CV    | granular | (SD)  | CV    | infragranular | (SD)  | CV    | all layers | (SD)  | CV    |
| <b>1</b>   | 258           | (108) | 0.420 | 222      | (103) | 0.466 | 190           | (85)  | 0.444 | 232        | (103) | 0.443 |
| <b>2</b>   | 251           | (126) | 0.370 | 233      | (138) | 0.442 | 192           | (108) | 0.374 | 230        | (121) | 0.378 |
| <b>3a</b>  | 284           | (126) | 0.358 | 213      | (105) | 0.434 | 180           | (95)  | 0.482 | 244        | (116) | 0.401 |
| <b>3b</b>  | 366           | (144) | 0.366 | 360      | (156) | 0.420 | 241           | (99)  | 0.413 | 332        | (132) | 0.377 |
| <b>V1</b>  | 417           | (176) | 0.422 | 349      | (148) | 0.425 | 164           | (76)  | 0.463 | 353        | (161) | 0.342 |
| <b>V2d</b> | 275           | (161) | 0.586 | 304      | (221) | 0.728 | 249           | (187) | 0.753 | 267        | (177) | 0.497 |
| <b>V2v</b> | 241           | (114) | 0.473 | 273      | (132) | 0.484 | 205           | (133) | 0.646 | 230        | (116) | 0.415 |
| <b>V3A</b> | 243           | (144) | 0.591 | 235      | (158) | 0.674 | 208           | (168) | 0.812 | 230        | (152) | 0.512 |
| <b>V3d</b> | 234           | (132) | 0.563 | 250      | (128) | 0.514 | 203           | (112) | 0.554 | 225        | (124) | 0.462 |
| <b>V3v</b> | 233           | (96)  | 0.413 | 258      | (86)  | 0.332 | 195           | (73)  | 0.377 | 219        | (82)  | 0.416 |
| <b>V4v</b> | 208           | (79)  | 0.382 | 248      | (137) | 0.553 | 156           | (99)  | 0.636 | 185        | (96)  | 0.366 |
| <b>FG1</b> | 165           | (3)   | 0.017 | 149      | (6)   | 0.043 | 105           | (25)  | 0.239 | 137        | (10)  | 0.074 |
| <b>FG2</b> | 159           | (2)   | 0.010 | 168      | (31)  | 0.186 | 116           | (10)  | 0.088 | 138        | (11)  | 0.078 |
| <b>37B</b> | 174           | (70)  | 0.334 | 181      | (84)  | 0.374 | 141           | (67)  | 0.365 | 162        | (72)  | 0.354 |
| <b>37L</b> | 151           | (80)  | 0.526 | 157      | (95)  | 0.603 | 134           | (84)  | 0.628 | 146        | (82)  | 0.560 |
| <b>37M</b> | 167           | (97)  | 0.580 | 170      | (113) | 0.662 | 119           | (78)  | 0.656 | 149        | (93)  | 0.623 |
| <b>41</b>  | 288           | (149) | 0.366 | 271      | (192) | 0.450 | 214           | (139) | 0.419 | 263        | (152) | 0.386 |

|            |     |       |       |     |       |       |     |       |       |     |       |       |
|------------|-----|-------|-------|-----|-------|-------|-----|-------|-------|-----|-------|-------|
| <b>42</b>  | 234 | (130) | 0.554 | 210 | (135) | 0.643 | 162 | (95)  | 0.587 | 210 | (119) | 0.568 |
| <b>20</b>  | 177 | (82)  | 0.460 | 188 | (103) | 0.549 | 153 | (87)  | 0.570 | 169 | (86)  | 0.511 |
| <b>21</b>  | 198 | (137) | 0.557 | 200 | (147) | 0.622 | 157 | (110) | 0.585 | 184 | (129) | 0.570 |
| <b>22</b>  | 216 | (131) | 0.608 | 200 | (123) | 0.615 | 148 | (84)  | 0.567 | 190 | (114) | 0.598 |
| <b>36</b>  | 183 | (92)  | 0.500 | 203 | (117) | 0.579 | 157 | (90)  | 0.577 | 175 | (94)  | 0.536 |
| <b>38</b>  | 137 | (93)  | 0.138 | 141 | (78)  | 0.062 | 110 | (65)  | 0.068 | 127 | (80)  | 0.103 |
| <b>5L</b>  | 173 | (80)  | 0.464 | 153 | (80)  | 0.524 | 127 | (71)  | 0.557 | 157 | (76)  | 0.485 |
| <b>5M</b>  | 175 | (80)  | 0.458 | 149 | (81)  | 0.542 | 135 | (76)  | 0.560 | 159 | (77)  | 0.486 |
| <b>PGa</b> | 168 | (51)  | 0.305 | 165 | (52)  | 0.317 | 132 | (49)  | 0.373 | 155 | (51)  | 0.327 |
| <b>PGp</b> | 172 | (81)  | 0.470 | 170 | (85)  | 0.501 | 137 | (73)  | 0.537 | 159 | (79)  | 0.494 |
| <b>PFt</b> | 152 | (72)  | 0.470 | 151 | (78)  | 0.515 | 125 | (70)  | 0.557 | 142 | (72)  | 0.507 |
| <b>PFm</b> | 174 | (82)  | 0.225 | 169 | (82)  | 0.303 | 136 | (62)  | 0.287 | 159 | (73)  | 0.240 |
| <b>24</b>  | 290 | (173) | 0.094 | --  | --    | --    | 188 | (115) | 0.204 | 242 | (145) | 0.105 |
| <b>32</b>  | 331 | (235) | 0.010 | 239 | (164) | 0.167 | 203 | (138) | 0.192 | 269 | (180) | 0.062 |
| <b>23</b>  | 145 | (44)  | 0.308 | 129 | (46)  | 0.361 | 96  | (35)  | 0.367 | 127 | (40)  | 0.319 |
| <b>31</b>  | 169 | (40)  | 0.235 | 158 | (50)  | 0.317 | 132 | (40)  | 0.302 | 156 | (40)  | 0.255 |
| <b>4</b>   | 152 | (9)   | 0.425 | 97  | (23)  | 0.276 | 86  | (23)  | 0.381 | 111 | (15)  | 0.406 |
| <b>6</b>   | 120 | (24)  | 0.236 | 89  | (30)  | 0.119 | 69  | (19)  | 0.234 | 92  | (19)  | 0.240 |
| <b>8</b>   | 266 | (176) | 0.198 | 204 | (115) | 0.250 | 177 | (120) | 0.323 | 225 | (145) | 0.225 |
| <b>9</b>   | 215 | (169) | 0.024 | 180 | (128) | 0.014 | 145 | (112) | 0.033 | 185 | (141) | 0.023 |
| <b>10L</b> | 193 | (134) | 0.105 | 181 | (104) | 0.030 | 145 | (98)  | 0.090 | 175 | (119) | 0.094 |
| <b>10M</b> | 196 | (127) | 0.161 | 183 | (103) | 0.122 | 146 | (89)  | 0.082 | 177 | (111) | 0.143 |
| <b>11</b>  | 225 | (196) | 0.070 | 221 | (180) | 0.052 | 174 | (154) | 0.090 | 207 | (179) | 0.033 |
| <b>44</b>  | 226 | (13)  | 0.010 | 180 | (25)  | 0.004 | 160 | (15)  | 0.044 | 179 | (15)  | 0.021 |
| <b>45</b>  | 186 | (154) | 0.285 | 155 | (122) | 0.260 | 132 | (107) | 0.242 | 165 | (136) | 0.284 |
| <b>46</b>  | 239 | (169) | 0.087 | 212 | (129) | 0.064 | 177 | (110) | 0.099 | 215 | (145) | 0.083 |
| <b>47</b>  | 212 | (131) | 0.107 | 189 | (101) | 0.075 | 158 | (89)  | 0.131 | 193 | (114) | 0.103 |

| Region | 5-HT <sub>1A</sub> |      |    |          |      |    |               |      |    |            |      |    |
|--------|--------------------|------|----|----------|------|----|---------------|------|----|------------|------|----|
|        | supragranular      | (SD) | CV | granular | (SD) | CV | infragranular | (SD) | CV | all layers | (SD) | CV |

|            |     |       |       |     |       |       |     |       |       |     |       |       |
|------------|-----|-------|-------|-----|-------|-------|-----|-------|-------|-----|-------|-------|
| <b>1</b>   | 608 | (401) | 0.393 | 104 | (50)  | 0.257 | 170 | (52)  | 0.245 | 410 | (269) | 0.356 |
| <b>2</b>   | 780 | (515) | 0.660 | 186 | (91)  | 0.491 | 259 | (167) | 0.646 | 576 | (321) | 0.557 |
| <b>3a</b>  | 591 | (445) | 0.434 | 108 | (66)  | 0.067 | 148 | (101) | 0.500 | 420 | (312) | 0.363 |
| <b>3b</b>  | 536 | (378) | 0.316 | 84  | (35)  | 0.185 | 116 | (63)  | 0.603 | 354 | (213) | 0.259 |
| <b>V1</b>  | 433 | (296) | 0.684 | 72  | (28)  | 0.391 | 37  | (3)   | 0.077 | 267 | (198) | 0.657 |
| <b>V2d</b> | 537 | (225) | 0.420 | 124 | (98)  | 0.785 | 84  | (39)  | 0.463 | 306 | (131) | 0.475 |
| <b>V2v</b> | 588 | (99)  | 0.168 | 95  | (31)  | 0.322 | 94  | (61)  | 0.648 | 341 | (3)   | 0.256 |
| <b>V3A</b> | 570 | (340) | 0.596 | 63  | (23)  | 0.364 | 107 | (73)  | 0.679 | 345 | (198) | 0.419 |
| <b>V3d</b> | 534 | (222) | 0.415 | 75  | (22)  | 0.294 | 85  | (24)  | 0.287 | 342 | (143) | 0.376 |
| <b>V3v</b> | 614 | (60)  | 0.097 | 119 | (76)  | 0.640 | 104 | (26)  | 0.250 | 366 | (14)  | 0.250 |
| <b>V4v</b> | 750 | (649) | 0.866 | 206 | (198) | 0.961 | 151 | (87)  | 0.578 | 428 | (359) | 0.459 |
| <b>FG1</b> | 377 | (96)  | 0.253 | 124 | (75)  | 0.606 | 169 | (137) | 0.809 | 268 | (20)  | 0.073 |
| <b>FG2</b> | 525 | (154) | 0.294 | 115 | (87)  | 0.752 | 129 | (69)  | 0.537 | 308 | (137) | 0.442 |
| <b>37B</b> | 665 | (406) | 0.611 | 215 | (86)  | 0.400 | 284 | (151) | 0.530 | 555 | (187) | 0.337 |
| <b>37L</b> | 573 | (343) | 0.598 | 156 | (90)  | 0.578 | 253 | (118) | 0.466 | 450 | (192) | 0.427 |
| <b>37M</b> | 758 | (454) | 0.304 | 166 | (89)  | 0.343 | 282 | (108) | 0.421 | 501 | (281) | 0.268 |
| <b>41</b>  | 695 | (624) | 0.546 | 93  | (49)  | 0.172 | 142 | (85)  | 0.341 | 482 | (366) | 0.450 |
| <b>42</b>  | 838 | (699) | 0.496 | 127 | (76)  | 0.254 | 186 | (131) | 0.197 | 602 | (427) | 0.301 |
| <b>20</b>  | 764 | (327) | 0.428 | 236 | (77)  | 0.326 | 379 | (169) | 0.447 | 615 | (221) | 0.359 |
| <b>21</b>  | 872 | (473) | 0.503 | 246 | (95)  | 0.313 | 406 | (212) | 0.318 | 664 | (316) | 0.413 |
| <b>22</b>  | 725 | (456) | 0.300 | 163 | (91)  | 0.250 | 286 | (160) | 0.268 | 509 | (315) | 0.239 |
| <b>36</b>  | 947 | (485) | 0.524 | 281 | (90)  | 0.300 | 382 | (142) | 0.332 | 688 | (273) | 0.366 |
| <b>38</b>  | 834 | (432) | 0.059 | 288 | (94)  | 0.040 | 391 | (142) | 0.025 | 603 | (279) | 0.056 |
| <b>5L</b>  | 616 | (306) | 0.393 | 164 | (72)  | 0.230 | 210 | (72)  | 0.247 | 441 | (176) | 0.263 |
| <b>5M</b>  | 581 | (148) | 0.256 | 122 | (32)  | 0.263 | 203 | (67)  | 0.328 | 397 | (108) | 0.271 |
| <b>PGa</b> | 516 | (251) | 0.204 | 163 | (76)  | 0.131 | 245 | (86)  | 0.116 | 369 | (191) | 0.244 |
| <b>PGp</b> | 502 | (275) | 0.315 | 179 | (89)  | 0.251 | 230 | (110) | 0.341 | 381 | (185) | 0.224 |
| <b>PFt</b> | 657 | (301) | 0.396 | 217 | (76)  | 0.328 | 313 | (88)  | 0.280 | 493 | (185) | 0.312 |
| <b>PFm</b> | 631 | (332) | 0.448 | 191 | (108) | 0.357 | 283 | (126) | 0.351 | 488 | (194) | 0.275 |
| <b>24</b>  | 776 | (536) | 0.691 | --  | --    | --    | 370 | (174) | 0.471 | 568 | (338) | 0.596 |

|            |     |       |       |     |       |       |     |       |       |     |       |       |
|------------|-----|-------|-------|-----|-------|-------|-----|-------|-------|-----|-------|-------|
| <b>32</b>  | 653 | (401) | 0.150 | 211 | (98)  | 0.166 | 268 | (114) | 0.005 | 453 | (245) | 0.090 |
| <b>23</b>  | 395 | (127) | 0.150 | 128 | (28)  | 0.172 | 226 | (63)  | 0.197 | 305 | (92)  | 0.147 |
| <b>31</b>  | 542 | (245) | 0.452 | 167 | (61)  | 0.363 | 229 | (129) | 0.564 | 430 | (139) | 0.324 |
| <b>4</b>   | 291 | (60)  | 0.615 | 73  | (8)   | 0.078 | 94  | (1)   | 0.494 | 162 | (31)  | 0.592 |
| <b>6</b>   | 357 | (59)  | 0.582 | 113 | (34)  | 1.069 | 140 | (49)  | 0.967 | 238 | (51)  | 0.696 |
| <b>8</b>   | 528 | (122) | 0.231 | 221 | (87)  | 0.393 | 279 | (90)  | 0.321 | 408 | (101) | 0.247 |
| <b>9</b>   | 572 | (220) | 0.006 | 214 | (188) | 0.149 | 313 | (190) | 0.015 | 444 | (204) | 0.022 |
| <b>10L</b> | 634 | (285) | 0.143 | 193 | (73)  | 0.082 | 280 | (109) | 0.157 | 458 | (198) | 0.139 |
| <b>10M</b> | 605 | (252) | 0.048 | 208 | (95)  | 0.273 | 301 | (95)  | 0.108 | 444 | (164) | 0.093 |
| <b>11</b>  | 667 | (269) | 0.065 | 234 | (110) | 0.294 | 331 | (126) | 0.043 | 505 | (190) | 0.105 |
| <b>44</b>  | 491 | (64)  | 0.177 | 158 | (54)  | 0.031 | 228 | (46)  | 0.296 | 284 | (38)  | 0.204 |
| <b>45</b>  | 573 | (484) | 0.414 | 132 | (102) | 0.284 | 173 | (111) | 0.321 | 404 | (346) | 0.445 |
| <b>46</b>  | 674 | (409) | 0.203 | 202 | (112) | 0.124 | 326 | (141) | 0.177 | 496 | (284) | 0.190 |
| <b>47</b>  | 672 | (308) | 0.052 | 228 | (90)  | 0.021 | 321 | (121) | 0.006 | 505 | (208) | 0.041 |

| Region     | 5-HT <sub>2</sub> |       |       |          |       |       |               |       |       |            |       |       |
|------------|-------------------|-------|-------|----------|-------|-------|---------------|-------|-------|------------|-------|-------|
|            | supragranular     | (SD)  | CV    | granular | (SD)  | CV    | infragranular | (SD)  | CV    | all layers | (SD)  | CV    |
| <b>1</b>   | 382               | (135) | 0.352 | 329      | (105) | 0.320 | 224           | (63)  | 0.282 | 332        | (105) | 0.316 |
| <b>2</b>   | 426               | (144) | 0.339 | 380      | (143) | 0.377 | 264           | (128) | 0.485 | 374        | (126) | 0.337 |
| <b>3a</b>  | 423               | (148) | 0.351 | 377      | (156) | 0.414 | 263           | (108) | 0.411 | 338        | (121) | 0.358 |
| <b>3b</b>  | 482               | (173) | 0.144 | 467      | (178) | 0.272 | 246           | (115) | 0.424 | 411        | (157) | 0.197 |
| <b>V1</b>  | 551               | (264) | 0.480 | 601      | (262) | 0.459 | 263           | (106) | 0.403 | 506        | (241) | 0.444 |
| <b>V2d</b> | 520               | (133) | 0.256 | 473      | (89)  | 0.187 | 233           | (16)  | 0.071 | 393        | (74)  | 0.330 |
| <b>V2v</b> | 508               | (82)  | 0.162 | 570      | (221) | 0.368 | 350           | (121) | 0.345 | 451        | (78)  | 0.310 |
| <b>V3A</b> | 397               | (56)  | 0.141 | 436      | (85)  | 0.196 | 277           | (13)  | 0.048 | 354        | (34)  | 0.245 |
| <b>V3d</b> | 418               | (81)  | 0.194 | 337      | (58)  | 0.172 | 254           | (58)  | 0.228 | 357        | (21)  | 0.230 |
| <b>V3v</b> | 521               | (103) | 0.198 | 504      | (125) | 0.247 | 238           | (62)  | 0.258 | 404        | (56)  | 0.385 |
| <b>V4v</b> | 454               | (101) | 0.221 | 481      | (284) | 0.591 | 285           | (160) | 0.562 | 374        | (149) | 0.300 |
| <b>FG1</b> | 257               | (41)  | 0.109 | 157      | (16)  | 0.115 | 116           | (33)  | 0.045 | 187        | (37)  | 0.123 |
| <b>FG2</b> | 318               | (71)  | 0.009 | 278      | (19)  | 0.009 | 203           | (33)  | 0.005 | 253        | (25)  | 0.023 |

|            |     |       |       |     |       |       |     |       |       |     |       |       |
|------------|-----|-------|-------|-----|-------|-------|-----|-------|-------|-----|-------|-------|
| <b>37B</b> | 460 | (213) | 0.462 | 323 | (152) | 0.470 | 261 | (64)  | 0.245 | 301 | (107) | 0.354 |
| <b>37L</b> | 416 | (150) | 0.361 | 372 | (154) | 0.413 | 260 | (105) | 0.405 | 343 | (122) | 0.357 |
| <b>37M</b> | 422 | (155) | 0.368 | 383 | (187) | 0.489 | 294 | (175) | 0.597 | 350 | (170) | 0.485 |
| <b>41</b>  | 481 | (188) | 0.392 | 469 | (273) | 0.582 | 264 | (150) | 0.569 | 388 | (193) | 0.496 |
| <b>42</b>  | 502 | (179) | 0.356 | 405 | (175) | 0.433 | 291 | (119) | 0.409 | 389 | (164) | 0.421 |
| <b>20</b>  | 508 | (256) | 0.505 | 379 | (138) | 0.364 | 301 | (139) | 0.463 | 372 | (139) | 0.372 |
| <b>21</b>  | 516 | (182) | 0.378 | 427 | (137) | 0.297 | 332 | (112) | 0.233 | 410 | (131) | 0.262 |
| <b>22</b>  | 442 | (143) | 0.324 | 358 | (148) | 0.413 | 268 | (108) | 0.402 | 346 | (141) | 0.408 |
| <b>36</b>  | 464 | (177) | 0.382 | 387 | (212) | 0.547 | 346 | (172) | 0.497 | 375 | (198) | 0.527 |
| <b>38</b>  | 457 | (282) | 0.107 | 415 | (246) | 0.038 | 300 | (167) | 0.130 | 392 | (232) | 0.020 |
| <b>5L</b>  | 395 | (174) | 0.387 | 425 | (181) | 0.285 | 302 | (160) | 0.494 | 387 | (152) | 0.308 |
| <b>5M</b>  | 429 | (135) | 0.315 | 418 | (197) | 0.472 | 309 | (159) | 0.514 | 377 | (150) | 0.397 |
| <b>PGa</b> | 413 | (190) | 0.451 | 430 | (214) | 0.425 | 318 | (160) | 0.466 | 382 | (179) | 0.436 |
| <b>PGp</b> | 362 | (160) | 0.188 | 369 | (204) | 0.203 | 234 | (107) | 0.128 | 325 | (144) | 0.168 |
| <b>PFt</b> | 461 | (99)  | 0.215 | 379 | (154) | 0.407 | 308 | (88)  | 0.285 | 357 | (120) | 0.336 |
| <b>PFm</b> | 461 | (152) | 0.330 | 406 | (204) | 0.503 | 305 | (126) | 0.412 | 368 | (155) | 0.423 |
| <b>24</b>  | 435 | (214) | 0.077 | --  | --    | --    | 367 | (209) | 0.055 | 401 | (209) | 0.051 |
| <b>32</b>  | 400 | (254) | 0.018 | 410 | (261) | 0.028 | 309 | (189) | 0.008 | 367 | (227) | 0.001 |
| <b>23</b>  | 447 | (190) | 0.424 | 434 | (199) | 0.459 | 304 | (119) | 0.393 | 399 | (169) | 0.423 |
| <b>31</b>  | 503 | (173) | 0.377 | 475 | (236) | 0.500 | 361 | (164) | 0.500 | 413 | (188) | 0.482 |
| <b>4</b>   | 300 | (10)  | 0.292 | 265 | (8)   | 0.251 | 194 | (5)   | 0.385 | 234 | (2)   | 0.320 |
| <b>6</b>   | 227 | (24)  | 0.660 | 221 | (41)  | 0.399 | 180 | (38)  | 0.676 | 203 | (31)  | 0.700 |
| <b>8</b>   | 354 | (140) | 0.028 | 329 | (122) | 0.027 | 249 | (73)  | 0.075 | 313 | (114) | 0.050 |
| <b>9</b>   | 330 | (125) | 0.063 | 296 | (101) | 0.014 | 229 | (72)  | 0.036 | 289 | (101) | 0.017 |
| <b>10L</b> | 320 | (74)  | 0.020 | 317 | (68)  | 0.011 | 251 | (60)  | 0.039 | 296 | (69)  | 0.017 |
| <b>10M</b> | 315 | (99)  | 0.190 | 325 | (95)  | 0.171 | 260 | (79)  | 0.141 | 297 | (90)  | 0.174 |
| <b>11</b>  | 360 | (152) | 0.150 | 359 | (161) | 0.158 | 282 | (122) | 0.222 | 334 | (141) | 0.165 |
| <b>44</b>  | 317 | (10)  | 0.081 | 312 | (27)  | 0.072 | 235 | (23)  | 0.053 | 271 | (11)  | 0.020 |
| <b>45</b>  | 295 | (201) | 0.213 | 282 | (205) | 0.282 | 211 | (167) | 0.262 | 266 | (192) | 0.256 |
| <b>46</b>  | 388 | (182) | 0.046 | 365 | (190) | 0.004 | 292 | (153) | 0.004 | 352 | (174) | 0.025 |

|               |                      |             |           |                 |             |           |                      |             |           |                   |             |           |
|---------------|----------------------|-------------|-----------|-----------------|-------------|-----------|----------------------|-------------|-----------|-------------------|-------------|-----------|
| <b>47</b>     | 393                  | (173)       | 0.126     | 384             | (190)       | 0.103     | 307                  | (146)       | 0.119     | 366               | (163)       | 0.120     |
| <b>Region</b> | <b>D<sub>1</sub></b> |             |           |                 |             |           |                      |             |           |                   |             |           |
|               | <b>supragranular</b> | <b>(SD)</b> | <b>CV</b> | <b>granular</b> | <b>(SD)</b> | <b>CV</b> | <b>infragranular</b> | <b>(SD)</b> | <b>CV</b> | <b>all layers</b> | <b>(SD)</b> | <b>CV</b> |
| <b>1</b>      | 87                   | (32)        | 0.364     | 60              | (24)        | 0.393     | 48                   | (24)        | 0.512     | 72                | (28)        | 0.382     |
| <b>2</b>      | 99                   | (25)        | 0.255     | 81              | (25)        | 0.311     | 68                   | (21)        | 0.303     | 87                | (24)        | 0.279     |
| <b>3a</b>     | 76                   | (22)        | 0.286     | 59              | (14)        | 0.231     | 44                   | (15)        | 0.335     | 65                | (18)        | 0.281     |
| <b>3b</b>     | 108                  | (24)        | 0.224     | 80              | (30)        | 0.372     | 57                   | (16)        | 0.285     | 90                | (22)        | 0.250     |
| <b>V1</b>     | 135                  | (74)        | 0.552     | 122             | (58)        | 0.479     | 87                   | (16)        | 0.277     | 118               | (55)        | 0.366     |
| <b>V2d</b>    | 133                  | (50)        | 0.372     | 99              | (22)        | 0.222     | 76                   | (11)        | 0.145     | 106               | (30)        | 0.300     |
| <b>V2v</b>    | 132                  | (43)        | 0.326     | 121             | (55)        | 0.456     | 59                   | (34)        | 0.391     | 111               | (32)        | 0.286     |
| <b>V3A</b>    | 118                  | (37)        | 0.312     | 88              | (16)        | 0.187     | 76                   | (15)        | 0.194     | 99                | (25)        | 0.282     |
| <b>V3d</b>    | 114                  | (34)        | 0.297     | 95              | (28)        | 0.292     | 72                   | (15)        | 0.204     | 98                | (27)        | 0.273     |
| <b>V3v</b>    | 128                  | (50)        | 0.390     | 113             | (51)        | 0.448     | 70                   | (13)        | 0.180     | 102               | (28)        | 0.306     |
| <b>V4v</b>    | 115                  | (39)        | 0.337     | 114             | (50)        | 0.439     | 70                   | (28)        | 0.399     | 93                | (36)        | 0.280     |
| <b>FG1</b>    | 69                   | (13)        | 0.189     | 59              | (1)         | 0.003     | 38                   | (9)         | 0.239     | 55                | (3)         | 0.047     |
| <b>FG2</b>    | 85                   | (8)         | 0.091     | 72              | (11)        | 0.160     | 57                   | (12)        | 0.203     | 70                | (12)        | 0.168     |
| <b>37B</b>    | 97                   | (27)        | 0.276     | 82              | (18)        | 0.221     | 71                   | (20)        | 0.279     | 86                | (23)        | 0.267     |
| <b>37L</b>    | 91                   | (27)        | 0.292     | 75              | (23)        | 0.308     | 66                   | (17)        | 0.250     | 81                | (23)        | 0.288     |
| <b>37M</b>    | 97                   | (27)        | 0.282     | 78              | (21)        | 0.273     | 71                   | (24)        | 0.337     | 84                | (26)        | 0.303     |
| <b>41</b>     | 86                   | (26)        | 0.304     | 68              | (20)        | 0.298     | 53                   | (17)        | 0.317     | 74                | (22)        | 0.299     |
| <b>42</b>     | 79                   | (8)         | 0.099     | 61              | (6)         | 0.091     | 48                   | (5)         | 0.114     | 67                | (5)         | 0.070     |
| <b>20</b>     | 68                   | (21)        | 0.313     | 58              | (18)        | 0.311     | 52                   | (16)        | 0.305     | 61                | (18)        | 0.290     |
| <b>21</b>     | 78                   | (24)        | 0.303     | 69              | (22)        | 0.313     | 56                   | (17)        | 0.310     | 69                | (21)        | 0.299     |
| <b>22</b>     | 68                   | (17)        | 0.245     | 51              | (14)        | 0.273     | 43                   | (12)        | 0.281     | 57                | (14)        | 0.237     |
| <b>36</b>     | 74                   | (29)        | 0.351     | 64              | (26)        | 0.351     | 60                   | (24)        | 0.326     | 67                | (26)        | 0.334     |
| <b>38</b>     | 111                  | (47)        | 0.074     | 100             | (39)        | 0.122     | 79                   | (33)        | 0.323     | 97                | (41)        | 0.166     |
| <b>5L</b>     | 88                   | (46)        | 0.515     | 72              | (39)        | 0.545     | 58                   | (32)        | 0.554     | 77                | (40)        | 0.519     |
| <b>5M</b>     | 85                   | (46)        | 0.538     | 70              | (36)        | 0.515     | 56                   | (27)        | 0.480     | 74                | (38)        | 0.506     |
| <b>PGa</b>    | 75                   | (36)        | 0.471     | 64              | (27)        | 0.423     | 54                   | (23)        | 0.416     | 67                | (31)        | 0.458     |

|            |     |      |       |    |      |       |    |      |       |    |      |       |
|------------|-----|------|-------|----|------|-------|----|------|-------|----|------|-------|
| <b>PGp</b> | 96  | (34) | 0.356 | 82 | (24) | 0.296 | 64 | (16) | 0.249 | 84 | (27) | 0.327 |
| <b>PFt</b> | 84  | (37) | 0.440 | 71 | (29) | 0.402 | 58 | (26) | 0.440 | 73 | (32) | 0.436 |
| <b>PFm</b> | 87  | (41) | 0.478 | 74 | (40) | 0.538 | 63 | (30) | 0.471 | 77 | (36) | 0.468 |
| <b>24</b>  | 111 | (35) | 0.314 | -- | --   | --    | 81 | (27) | 0.326 | 97 | (30) | 0.312 |
| <b>32</b>  | 93  | (43) | 0.482 | 90 | (37) | 0.052 | 70 | (25) | 0.507 | 83 | (35) | 0.357 |
| <b>23</b>  | 86  | (23) | 0.265 | 70 | (17) | 0.238 | 55 | (18) | 0.323 | 74 | (20) | 0.264 |
| <b>31</b>  | 93  | (45) | 0.110 | 81 | (37) | 0.124 | 66 | (34) | 0.158 | 83 | (40) | 0.115 |
| <b>4</b>   | 61  | (6)  | 0.563 | 54 | (1)  | 0.075 | 42 | (2)  | 0.650 | 49 | (5)  | 0.601 |
| <b>6</b>   | 36  | (7)  | 0.490 | 32 | (5)  | 0.172 | 24 | (4)  | 0.518 | 30 | (6)  | 0.502 |
| <b>8</b>   | 81  | (21) | 0.266 | 76 | (18) | 0.234 | 60 | (14) | 0.229 | 72 | (17) | 0.230 |
| <b>9</b>   | 86  | (17) | 0.201 | 82 | (11) | 0.138 | 63 | (9)  | 0.148 | 77 | (14) | 0.183 |
| <b>10L</b> | 84  | (9)  | 0.103 | 81 | (6)  | 0.076 | 63 | (10) | 0.160 | 76 | (9)  | 0.117 |
| <b>10M</b> | 78  | (11) | 0.140 | 85 | (9)  | 0.109 | 66 | (12) | 0.181 | 74 | (10) | 0.133 |
| <b>11</b>  | 91  | (17) | 0.188 | 92 | (19) | 0.201 | 72 | (20) | 0.280 | 85 | (18) | 0.209 |
| <b>44</b>  | 74  | (23) | 0.453 | 71 | (18) | 0.370 | 54 | (17) | 0.406 | 62 | (20) | 0.426 |
| <b>45</b>  | 76  | (58) | 0.523 | 69 | (46) | 0.476 | 56 | (38) | 0.546 | 69 | (51) | 0.531 |
| <b>46</b>  | 80  | (20) | 0.253 | 74 | (17) | 0.227 | 61 | (13) | 0.213 | 73 | (17) | 0.239 |
| <b>47</b>  | 75  | (15) | 0.005 | 74 | (12) | 0.045 | 62 | (11) | 0.016 | 71 | (13) | 0.009 |
